# Supplementary material for: Human gut colonisation may be initiated in utero by distinct microbial communities in the placenta and amniotic fluid
Source: PubMed Central journal article supplement (PMC4802384; doi:10.1038/srep23129), 2016-03-22

**Human gut colonisation may be initiated *in utero* by distinct microbial communities in the placenta and amniotic fluid**

Maria Carmen Collado, Samuli Rautava, Juhani Aakko, Erika Isolauri, Seppo Salminen

**Supplementary Table 1.** Phylogenetic identification of organisms based on 16S rRNA gene sequences expressed as numbers of reads identified using RDP Classifier (<https://rdp.cme.msu.edu/>) with a confidence interval (CI) of 80%.

| taxid | name                                     | rank     | Mother | Amniotic | Placenta | Colostrum | Meconium | Infant |
|-------|------------------------------------------|----------|--------|----------|----------|-----------|----------|--------|
| 0     | Root                                     | rootrank | 57039  | 44013    | 34554    | 22130     | 32676    | 70934  |
| 1     | Bacteria                                 | domain   | 56726  | 42413    | 24220    | 15920     | 32527    | 70746  |
| 1617  | <i>Lachnospiraceae</i>                   | family   | 17565  | 7        | 1        | 15        | 12       | 4      |
| 1763  | <i>Ruminococcaceae</i>                   | family   | 11809  | 18       | 0        | 6         | 6        | 1      |
| 264   | <i>Streptococcaceae</i>                  | family   | 6245   | 190      | 28       | 2646      | 341      | 16897  |
| 1158  | <i>Coriobacteriaceae</i>                 | family   | 5370   | 1        | 1        | 2         | 7        | 26     |
| 2363  | <i>Erysipelotrichaceae</i>               | family   | 3425   | 2        | 0        | 1         | 3        | 0      |
| 567   | <i>Bacteroidaceae</i>                    | family   | 2379   | 3        | 2        | 1         | 0        | 0      |
| 2357  | <i>Peptostreptococcaceae</i>             | family   | 735    | 7        | 1        | 4         | 31       | 289    |
| 1721  | <i>Enterobacteriaceae</i>                | family   | 695    | 35203    | 18934    | 6447      | 131      | 3794   |
| 1240  | <i>Veillonellaceae</i>                   | family   | 662    | 16       | 9        | 42        | 117      | 31248  |
| 2371  | <i>Clostridiaceae 1</i>                  | family   | 278    | 3        | 0        | 2         | 230      | 1325   |
| 927   | <i>Actinomycetaceae</i>                  | family   | 252    | 20       | 2        | 25        | 10       | 1851   |
| 940   | <i>Porphyromonadaceae</i>                | family   | 205    | 7        | 4        | 6         | 14       | 0      |
| 2367  | <i>Clostridiales_Incertae Sedis XIII</i> | family   | 130    | 0        | 2        | 1         | 0        | 0      |
| 36    | <i>Moraxellaceae</i>                     | family   | 127    | 1230     | 10       | 273       | 38       | 1      |
| 886   | <i>Rikenellaceae</i>                     | family   | 120    | 0        | 0        | 0         | 0        | 0      |
| 2320  | <i>Verrucomicrobiaceae</i>               | family   | 115    | 0        | 0        | 0         | 0        | 0      |
| 1206  | <i>Prevotellaceae</i>                    | family   | 97     | 8        | 4        | 34        | 33       | 0      |
| 190   | <i>Propionibacteriaceae</i>              | family   | 82     | 980      | 443      | 617       | 665      | 142    |
| 844   | <i>Clostridiales_Incertae Sedis XI</i>   | family   | 80     | 13       | 10       | 21        | 27       | 2      |
| 1834  | <i>Sphingomonadaceae</i>                 | family   | 65     | 839      | 58       | 118       | 122      | 1      |
| 2714  | <i>Lactobacillaceae</i>                  | family   | 61     | 508      | 203      | 470       | 773      | 523    |
| 1814  | <i>Carnobacteriaceae</i>                 | family   | 52     | 19       | 1        | 40        | 15       | 3      |
| 1746  | <i>Bifidobacteriaceae</i>                | family   | 45     | 1        | 0        | 1         | 0        | 617    |
| 979   | <i>Eubacteriaceae</i>                    | family   | 30     | 0        | 1        | 2         | 6        | 0      |
| 1286  | <i>Phyllobacteriaceae</i>                | family   | 26     | 161      | 34       | 52        | 356      | 0      |
| 2290  | <i>Leuconostocaceae</i>                  | family   | 24     | 150      | 0        | 0         | 20       | 0      |
| 114   | <i>Acidaminococcaceae</i>                | family   | 22     | 1        | 0        | 0         | 0        | 0      |
| 1772  | <i>Methylobacteriaceae</i>               | family   | 16     | 177      | 5        | 1         | 67       | 6      |
| 19    | <i>Anaeroplasmataceae</i>                | family   | 15     | 0        | 0        | 0         | 0        | 0      |

|      |                                       |        |    |     |     |     |       |      |
|------|---------------------------------------|--------|----|-----|-----|-----|-------|------|
| 2342 | <i>Corynebacteriaceae</i>             | family | 14 | 128 | 31  | 253 | 179   | 159  |
| 2484 | <i>Oxalobacteraceae</i>               | family | 13 | 204 | 7   | 15  | 20    | 1    |
| 1195 | <i>Chitinophagaceae</i>               | family | 8  | 353 | 126 | 316 | 1096  | 0    |
| 2503 | <i>Micrococcaceae</i>                 | family | 8  | 56  | 22  | 38  | 59    | 60   |
| 908  | <i>Victivallaceae</i>                 | family | 8  | 0   | 0   | 0   | 0     | 0    |
| 2417 | <i>Comamonadaceae</i>                 | family | 6  | 83  | 23  | 46  | 72    | 2    |
| 966  | <i>Vibrionaceae</i>                   | family | 6  | 49  | 4   | 0   | 2     | 0    |
| 154  | <i>Bacillales_Incertae Sedis XI</i>   | family | 6  | 32  | 3   | 427 | 23    | 169  |
| 2264 | <i>Staphylococcaceae</i>              | family | 5  | 85  | 64  | 985 | 20597 | 9276 |
| 470  | <i>Xanthomonadaceae</i>               | family | 5  | 52  | 13  | 34  | 47    | 0    |
| 2294 | <i>Chloroplast</i>                    | family | 5  | 52  | 35  | 32  | 15    | 0    |
| 132  | <i>Neisseriaceae</i>                  | family | 5  | 36  | 11  | 52  | 37    | 0    |
| 448  | <i>Pseudomonadaceae</i>               | family | 5  | 28  | 7   | 5   | 5     | 56   |
| 41   | <i>Sutterellaceae</i>                 | family | 5  | 0   | 0   | 0   | 0     | 3    |
| 1255 | <i>Pasteurellaceae</i>                | family | 4  | 48  | 13  | 153 | 75    | 1058 |
| 2479 | <i>Pseudoalteromonadaceae</i>         | family | 4  | 0   | 0   | 0   | 0     | 0    |
| 2445 | <i>Synergistaceae</i>                 | family | 4  | 0   | 0   | 0   | 0     | 0    |
| 950  | <i>Bradyrhizobiaceae</i>              | family | 3  | 89  | 36  | 61  | 200   | 0    |
| 436  | <i>Desulfovibrionaceae</i>            | family | 3  | 0   | 0   | 0   | 0     | 0    |
| 2334 | <i>Rhodobacteraceae</i>               | family | 2  | 45  | 28  | 15  | 18    | 0    |
| 255  | <i>Aerococcaceae</i>                  | family | 2  | 7   | 0   | 16  | 2     | 0    |
| 2308 | <i>Planococcaceae</i>                 | family | 2  | 6   | 0   | 0   | 6     | 0    |
| 104  | <i>Fusobacteriaceae</i>               | family | 2  | 2   | 2   | 12  | 30    | 0    |
| 871  | <i>Incertae Sedis XI</i>              | family | 2  | 0   | 0   | 0   | 0     | 0    |
| 2377 | <i>Oceanospirillaceae</i>             | family | 1  | 206 | 4   | 1   | 2094  | 17   |
| 898  | <i>Microbacteriaceae</i>              | family | 1  | 11  | 0   | 12  | 34    | 0    |
| 1479 | <i>Flavobacteriaceae</i>              | family | 1  | 10  | 3   | 10  | 10    | 0    |
| 648  | <i>Listeriaceae</i>                   | family | 1  | 10  | 5   | 0   | 6     | 0    |
| 1070 | <i>Intrasporangiaceae</i>             | family | 1  | 9   | 0   | 0   | 8     | 0    |
| 119  | <i>Rhizobiaceae</i>                   | family | 1  | 7   | 6   | 0   | 27    | 0    |
| 425  | <i>Brevibacteriaceae</i>              | family | 1  | 5   | 0   | 0   | 3     | 0    |
| 2384 | <i>Brucellaceae</i>                   | family | 1  | 3   | 3   | 1   | 23    | 0    |
| 792  | <i>Shewanellaceae</i>                 | family | 1  | 1   | 0   | 4   | 0     | 0    |
| 2288 | <i>Enterococcaceae</i>                | family | 0  | 294 | 0   | 657 | 3654  | 2131 |
| 354  | <i>Caulobacteraceae</i>               | family | 0  | 55  | 12  | 21  | 42    | 0    |
| 365  | <i>Dermabacteraceae</i>               | family | 0  | 29  | 0   | 0   | 14    | 1    |
| 49   | <i>Burkholderiaceae</i>               | family | 0  | 17  | 4   | 6   | 13    | 1    |
| 1508 | <i>Hyphomicrobiaceae</i>              | family | 0  | 16  | 2   | 6   | 6     | 0    |
| 1557 | <i>Xanthobacteraceae</i>              | family | 0  | 12  | 8   | 14  | 8     | 0    |
| 595  | <i>Bacillaceae 1</i>                  | family | 0  | 10  | 0   | 47  | 0     | 5    |
| 281  | <i>Dietziaceae</i>                    | family | 0  | 8   | 2   | 1   | 18    | 0    |
| 2724 | <i>Burkholderiales_incertae_sedis</i> | family | 0  | 8   | 5   | 16  | 15    | 0    |
| 313  | <i>Nocardioideaceae</i>               | family | 0  | 7   | 4   | 5   | 0     | 0    |
| 70   | <i>Aurantimonadaceae</i>              | family | 0  | 5   | 4   | 0   | 0     | 0    |
| 1567 | <i>Campylobacteraceae</i>             | family | 0  | 3   | 0   | 1   | 3     | 0    |
| 1177 | <i>Sphingobacteriaceae</i>            | family | 0  | 3   | 0   | 0   | 2     | 0    |

|      |                                       |        |      |     |    |      |     |       |
|------|---------------------------------------|--------|------|-----|----|------|-----|-------|
| 827  | <i>Acetobacteraceae</i>               | family | 0    | 3   | 8  | 3    | 0   | 0     |
| 705  | <i>Dermacoccaceae</i>                 | family | 0    | 3   | 1  | 3    | 0   | 0     |
| 1252 | <i>Clostridiaceae 2</i>               | family | 0    | 3   | 0  | 0    | 0   | 0     |
| 2395 | <i>Leptotrichiaceae</i>               | family | 0    | 2   | 5  | 1    | 11  | 0     |
| 2325 | <i>Bacillales_Incertae Sedis X</i>    | family | 0    | 2   | 0  | 0    | 0   | 0     |
| 456  | <i>Nocardiaceae</i>                   | family | 0    | 1   | 2  | 2    | 13  | 0     |
| 46   | <i>Aeromonadaceae</i>                 | family | 0    | 1   | 1  | 1    | 5   | 0     |
| 1152 | <i>Cytophagaceae</i>                  | family | 0    | 1   | 5  | 4    | 0   | 0     |
| 106  | <i>Pseudonocardiaceae</i>             | family | 0    | 1   | 3  | 3    | 0   | 0     |
| 1895 | <i>Streptomycetaceae</i>              | family | 0    | 1   | 3  | 0    | 0   | 0     |
| 1827 | <i>Geodermatophilaceae</i>            | family | 0    | 1   | 1  | 0    | 0   | 0     |
| 1669 | <i>Chromatiaceae</i>                  | family | 0    | 1   | 0  | 0    | 0   | 0     |
| 2292 | <i>Alcaligenaceae</i>                 | family | 0    | 1   | 0  | 0    | 0   | 0     |
| 2793 | <i>Planctomycetaceae</i>              | family | 0    | 1   | 0  | 0    | 0   | 0     |
| 2433 | <i>Caldilineaceae</i>                 | family | 0    | 1   | 0  | 0    | 0   | 0     |
| 1331 | <i>Thermoactinomycetaceae 1</i>       | family | 0    | 0   | 0  | 0    | 4   | 0     |
| 1455 | <i>Bacteroidales_incertae_sedis</i>   | family | 0    | 0   | 0  | 0    | 3   | 0     |
| 2297 | <i>Mycobacteriaceae</i>               | family | 0    | 0   | 4  | 1    | 2   | 0     |
| 2167 | <i>Erythrobacteraceae</i>             | family | 0    | 0   | 0  | 0    | 2   | 0     |
| 453  | <i>Cellulomonadaceae</i>              | family | 0    | 0   | 0  | 0    | 2   | 0     |
| 2187 | <i>Spirochaetaceae</i>                | family | 0    | 0   | 0  | 0    | 1   | 0     |
| 1927 | <i>Sinobacteraceae</i>                | family | 0    | 0   | 0  | 2    | 0   | 0     |
| 815  | <i>Coxiellaceae</i>                   | family | 0    | 0   | 0  | 2    | 0   | 0     |
| 1551 | <i>Bacillales_Incertae Sedis XII</i>  | family | 0    | 0   | 0  | 2    | 0   | 0     |
| 1909 | <i>Gaiellaceae</i>                    | family | 0    | 0   | 0  | 2    | 0   | 0     |
| 1407 | <i>Rhodocyclaceae</i>                 | family | 0    | 0   | 0  | 1    | 0   | 0     |
| 2627 | <i>Polyangiaceae</i>                  | family | 0    | 0   | 0  | 1    | 0   | 0     |
| 1280 | <i>Paenibacillaceae 1</i>             | family | 0    | 0   | 0  | 1    | 0   | 0     |
| 2057 | <i>Opitutaceae</i>                    | family | 0    | 0   | 0  | 1    | 0   | 0     |
| 90   | <i>Kineosporiaceae</i>                | family | 0    | 0   | 1  | 0    | 0   | 0     |
| 396  | <i>Solirubrobacteraceae</i>           | family | 0    | 0   | 1  | 0    | 0   | 0     |
| 1631 | <i>Streptococcus</i>                  | genus  | 6037 | 151 | 26 | 2638 | 285 | 16888 |
| 1767 | <i>Blautia</i>                        | genus  | 5434 | 2   | 0  | 5    | 2   | 0     |
| 274  | <i>Lachnospiraceae_incertae_sedis</i> | genus  | 2629 | 0   | 0  | 9    | 1   | 0     |
| 1165 | <i>Collinsella</i>                    | genus  | 2415 | 0   | 1  | 1    | 4   | 2     |
| 2364 | <i>Bacteroides</i>                    | genus  | 2379 | 3   | 2  | 1    | 0   | 0     |
| 2362 | <i>Faecalibacterium</i>               | genus  | 1616 | 0   | 0  | 0    | 1   | 0     |
| 1725 | <i>Ruminococcus</i>                   | genus  | 1527 | 0   | 0  | 1    | 3   | 0     |
| 1246 | <i>Slackia</i>                        | genus  | 1511 | 1   | 0  | 0    | 0   | 0     |
| 929  | <i>Ruminococcus2</i>                  | genus  | 1348 | 0   | 0  | 0    | 0   | 0     |
| 2372 | <i>Roseburia</i>                      | genus  | 1045 | 0   | 0  | 0    | 0   | 1     |
| 39   | <i>Oscillibacter</i>                  | genus  | 872  | 0   | 0  | 1    | 0   | 0     |
| 2369 | <i>Clostridium XI</i>                 | genus  | 709  | 1   | 1  | 3    | 30  | 276   |
| 1764 | <i>Dialister</i>                      | genus  | 625  | 0   | 0  | 0    | 0   | 0     |
| 946  | <i>Dorea</i>                          | genus  | 524  | 0   | 0  | 0    | 0   | 0     |
| 2322 | <i>Clostridium XVIII</i>              | genus  | 453  | 0   | 0  | 0    | 0   | 0     |

|      |                                               |       |     |       |       |      |     |       |
|------|-----------------------------------------------|-------|-----|-------|-------|------|-----|-------|
| 1161 | <i>Coprococcus</i>                            | genus | 440 | 0     | 0     | 0    | 0   | 0     |
| 1633 | <i>Eggerthella</i>                            | genus | 422 | 0     | 0     | 1    | 1   | 24    |
| 1227 | <i>Catenibacterium</i>                        | genus | 322 | 0     | 0     | 0    | 0   | 0     |
| 892  | <i>Turcibacter</i>                            | genus | 272 | 0     | 0     | 0    | 0   | 0     |
| 1823 | <i>Subdoligranulum</i>                        | genus | 244 | 0     | 0     | 0    | 0   | 0     |
| 2721 | <i>Actinomyces</i>                            | genus | 240 | 17    | 2     | 23   | 8   | 1371  |
| 2373 | <i>Clostridium sensu stricto</i>              | genus | 226 | 1     | 0     | 2    | 170 | 1096  |
| 1771 | <i>Clostridium IV</i>                         | genus | 208 | 0     | 0     | 0    | 0   | 0     |
| 2291 | <i>Escherichia/Shigella</i>                   | genus | 207 | 71    | 57    | 113  | 39  | 1120  |
| 984  | <i>Erysipelotrichaceae_incertae_sedis</i>     | genus | 206 | 0     | 0     | 0    | 2   | 0     |
| 847  | <i>Lactococcus</i>                            | genus | 204 | 39    | 2     | 8    | 56  | 0     |
| 1851 | <i>Flavonifractor</i>                         | genus | 196 | 1     | 0     | 0    | 0   | 0     |
| 196  | <i>Parabacteroides</i>                        | genus | 161 | 0     | 0     | 0    | 0   | 0     |
| 1308 | <i>Clostridium XIVa</i>                       | genus | 140 | 0     | 0     | 0    | 0   | 0     |
| 115  | <i>Alistipes</i>                              | genus | 120 | 0     | 0     | 0    | 0   | 0     |
| 1781 | <i>Akkermansia</i>                            | genus | 115 | 0     | 0     | 0    | 0   | 0     |
| 2368 | <i>Butyricoccus</i>                           | genus | 109 | 0     | 0     | 0    | 1   | 0     |
| 846  | <i>Prevotella</i>                             | genus | 94  | 6     | 2     | 13   | 14  | 0     |
| 199  | <i>Gordonibacter</i>                          | genus | 91  | 0     | 0     | 0    | 0   | 0     |
| 21   | <i>Anaerovorax</i>                            | genus | 90  | 0     | 0     | 0    | 0   | 0     |
| 2345 | <i>Propionibacterium</i>                      | genus | 82  | 976   | 439   | 617  | 664 | 141   |
| 1204 | <i>Enhydrobacter</i>                          | genus | 78  | 1068  | 0     | 66   | 9   | 1     |
| 918  | <i>Sphingomonas</i>                           | genus | 61  | 734   | 17    | 31   | 47  | 1     |
| 1754 | <i>Lactobacillus</i>                          | genus | 60  | 507   | 202   | 465  | 767 | 516   |
| 1216 | <i>Granulicatella</i>                         | genus | 52  | 17    | 1     | 40   | 14  | 3     |
| 969  | <i>Bifidobacterium</i>                        | genus | 43  | 1     | 0     | 1    | 0   | 614   |
| 581  | <i>Pseudoflavonifractor</i>                   | genus | 43  | 0     | 0     | 0    | 1   | 0     |
| 2295 | <i>Clostridium XIVb</i>                       | genus | 37  | 0     | 1     | 0    | 0   | 0     |
| 1626 | <i>Saccharibacteria_genera_incertae_sedis</i> | genus | 33  | 2     | 0     | 4    | 3   | 0     |
| 1854 | <i>Atopobium</i>                              | genus | 32  | 0     | 0     | 0    | 0   | 0     |
| 2529 | <i>Peptoniphilus</i>                          | genus | 31  | 3     | 1     | 1    | 3   | 0     |
| 2268 | <i>Porphyromonas</i>                          | genus | 30  | 7     | 4     | 3    | 13  | 0     |
| 42   | <i>Psychrobacter</i>                          | genus | 28  | 33    | 2     | 6    | 1   | 0     |
| 1256 | <i>Coprobaillus</i>                           | genus | 25  | 0     | 0     | 1    | 0   | 0     |
| 957  | <i>Leuconostoc</i>                            | genus | 22  | 128   | 0     | 0    | 20  | 0     |
| 445  | <i>Phascolarctobacterium</i>                  | genus | 22  | 0     | 0     | 0    | 0   | 0     |
| 175  | <i>Acinetobacter</i>                          | genus | 21  | 117   | 8     | 200  | 18  | 0     |
| 451  | <i>Enterobacter</i>                           | genus | 20  | 33212 | 17707 | 5817 | 4   | 13    |
| 138  | <i>Veillonella</i>                            | genus | 20  | 9     | 8     | 40   | 111 | 31231 |
| 2481 | <i>Adlercreutzia</i>                          | genus | 20  | 0     | 0     | 0    | 0   | 0     |
| 2418 | <i>Solobacterium</i>                          | genus | 19  | 0     | 0     | 0    | 0   | 0     |
| 192  | <i>Methylobacterium</i>                       | genus | 16  | 177   | 5     | 1    | 67  | 6     |
| 105  | <i>Mesorhizobium</i>                          | genus | 16  | 87    | 18    | 33   | 249 | 0     |
| 2341 | <i>Anaerococcus</i>                           | genus | 15  | 5     | 3     | 7    | 7   | 2     |
| 482  | <i>Corynebacterium</i>                        | genus | 14  | 128   | 31    | 252  | 175 | 153   |
| 1207 | <i>Massilia</i>                               | genus | 12  | 201   | 3     | 13   | 14  | 1     |

|      |                            |       |    |    |    |     |       |      |
|------|----------------------------|-------|----|----|----|-----|-------|------|
| 1296 | <i>Holdemania</i>          | genus | 12 | 0  | 0  | 0   | 0     | 0    |
| 2421 | <i>Anaerotruncus</i>       | genus | 11 | 0  | 0  | 0   | 0     | 0    |
| 1020 | <i>Asteroleplasma</i>      | genus | 10 | 0  | 0  | 0   | 0     | 0    |
| 1043 | <i>Barnesiella</i>         | genus | 8  | 0  | 0  | 0   | 0     | 0    |
| 261  | <i>Victivallis</i>         | genus | 8  | 0  | 0  | 0   | 0     | 0    |
| 156  | <i>Rothia</i>              | genus | 7  | 19 | 0  | 18  | 2     | 60   |
| 1748 | <i>Negativicoccus</i>      | genus | 7  | 1  | 0  | 0   | 2     | 0    |
| 903  | <i>Klebsiella</i>          | genus | 7  | 1  | 0  | 1   | 0     | 0    |
| 2423 | <i>Moryella</i>            | genus | 7  | 0  | 0  | 0   | 1     | 0    |
| 1481 | <i>Gemmiger</i>            | genus | 7  | 0  | 0  | 0   | 0     | 0    |
| 195  | <i>Photobacterium</i>      | genus | 6  | 49 | 4  | 0   | 2     | 0    |
| 123  | <i>Gemella</i>             | genus | 6  | 32 | 3  | 427 | 23    | 169  |
| 26   | <i>Eubacterium</i>         | genus | 6  | 0  | 1  | 2   | 6     | 0    |
| 430  | <i>Anaerofustis</i>        | genus | 6  | 0  | 0  | 0   | 0     | 0    |
| 2488 | <i>Staphylococcus</i>      | genus | 5  | 85 | 64 | 982 | 20548 | 9208 |
| 1093 | <i>Streptophyta</i>        | genus | 5  | 46 | 35 | 28  | 15    | 0    |
| 2526 | <i>Stenotrophomonas</i>    | genus | 5  | 29 | 5  | 18  | 45    | 0    |
| 1651 | <i>Pseudomonas</i>         | genus | 5  | 27 | 7  | 5   | 5     | 44   |
| 1239 | <i>Fingoldia</i>           | genus | 5  | 4  | 4  | 8   | 17    | 0    |
| 2389 | <i>Asaccharobacter</i>     | genus | 5  | 0  | 0  | 0   | 0     | 0    |
| 271  | <i>Olsenella</i>           | genus | 5  | 0  | 0  | 0   | 0     | 0    |
| 2718 | <i>Anaeroplasma</i>        | genus | 5  | 0  | 0  | 0   | 0     | 0    |
| 794  | <i>Neisseria</i>           | genus | 4  | 28 | 7  | 51  | 30    | 0    |
| 800  | <i>Mogibacterium</i>       | genus | 4  | 0  | 2  | 1   | 0     | 0    |
| 583  | <i>Pseudoalteromonas</i>   | genus | 4  | 0  | 0  | 0   | 0     | 0    |
| 479  | <i>Anaerostipes</i>        | genus | 4  | 0  | 0  | 0   | 0     | 0    |
| 2147 | <i>Mobiluncus</i>          | genus | 4  | 0  | 0  | 0   | 0     | 0    |
| 2660 | <i>Jonquetella</i>         | genus | 4  | 0  | 0  | 0   | 0     | 0    |
| 2626 | <i>Pelomonas</i>           | genus | 3  | 63 | 16 | 40  | 53    | 2    |
| 1845 | <i>Sediminibacterium</i>   | genus | 3  | 10 | 1  | 15  | 445   | 0    |
| 2340 | <i>Peptostreptococcus</i>  | genus | 3  | 6  | 0  | 1   | 0     | 0    |
| 1046 | <i>Sutterella</i>          | genus | 3  | 0  | 0  | 0   | 0     | 3    |
| 2355 | <i>Lachnoanaerobaculum</i> | genus | 3  | 0  | 0  | 0   | 0     | 0    |
| 2289 | <i>Odoribacter</i>         | genus | 3  | 0  | 0  | 0   | 0     | 0    |
| 139  | <i>Weissella</i>           | genus | 2  | 22 | 0  | 0   | 0     | 0    |
| 656  | <i>Acidovorax</i>          | genus | 2  | 5  | 2  | 0   | 0     | 0    |
| 2380 | <i>Paracoccus</i>          | genus | 2  | 4  | 10 | 11  | 6     | 0    |
| 357  | <i>Varibaculum</i>         | genus | 2  | 3  | 0  | 2   | 0     | 0    |
| 2679 | <i>Anaerofilum</i>         | genus | 2  | 3  | 0  | 1   | 0     | 0    |
| 54   | <i>Fusobacterium</i>       | genus | 2  | 2  | 2  | 12  | 30    | 0    |
| 1768 | <i>Parvimonas</i>          | genus | 2  | 1  | 2  | 1   | 0     | 0    |
| 1509 | <i>Actinobaculum</i>       | genus | 2  | 0  | 0  | 0   | 2     | 463  |
| 2662 | <i>Planomicrobium</i>      | genus | 2  | 0  | 0  | 0   | 4     | 0    |
| 481  | <i>Parasutterella</i>      | genus | 2  | 0  | 0  | 0   | 0     | 0    |
| 1852 | <i>Desulfovibrio</i>       | genus | 2  | 0  | 0  | 0   | 0     | 0    |
| 1558 | <i>Murdochiella</i>        | genus | 2  | 0  | 0  | 0   | 0     | 0    |

|      |                           |       |   |     |    |     |      |      |
|------|---------------------------|-------|---|-----|----|-----|------|------|
| 1637 | <i>Butyricimonas</i>      | genus | 2 | 0   | 0  | 0   | 0    | 0    |
| 2420 | <i>Marinomonas</i>        | genus | 1 | 206 | 4  | 1   | 2085 | 17   |
| 573  | <i>Novosphingobium</i>    | genus | 1 | 82  | 38 | 60  | 70   | 0    |
| 378  | <i>Micrococcus</i>        | genus | 1 | 29  | 13 | 12  | 34   | 0    |
| 2629 | <i>Haemophilus</i>        | genus | 1 | 15  | 5  | 39  | 50   | 552  |
| 322  | <i>Brochothrix</i>        | genus | 1 | 10  | 5  | 0   | 6    | 0    |
| 71   | <i>Rhizobium</i>          | genus | 1 | 7   | 6  | 0   | 27   | 0    |
| 1747 | <i>Microbacterium</i>     | genus | 1 | 6   | 0  | 8   | 33   | 0    |
| 1579 | <i>Janibacter</i>         | genus | 1 | 6   | 0  | 0   | 8    | 0    |
| 845  | <i>Brevibacterium</i>     | genus | 1 | 5   | 0  | 0   | 3    | 0    |
| 1196 | <i>Aerococcus</i>         | genus | 1 | 5   | 0  | 0   | 2    | 0    |
| 2461 | <i>Megasphaera</i>        | genus | 1 | 3   | 0  | 0   | 0    | 0    |
| 2514 | <i>Capnocytophaga</i>     | genus | 1 | 2   | 0  | 1   | 4    | 0    |
| 278  | <i>Abiotrophia</i>        | genus | 1 | 2   | 0  | 1   | 0    | 0    |
| 145  | <i>Shewanella</i>         | genus | 1 | 1   | 0  | 4   | 0    | 0    |
| 302  | <i>Sarcina</i>            | genus | 1 | 0   | 0  | 0   | 0    | 2    |
| 2899 | <i>Pluralibacter</i>      | genus | 1 | 0   | 0  | 0   | 1    | 0    |
| 596  | <i>Saccharofermentans</i> | genus | 1 | 0   | 0  | 1   | 0    | 0    |
| 477  | <i>Raoultella</i>         | genus | 1 | 0   | 0  | 0   | 0    | 0    |
| 2221 | <i>Daeguia</i>            | genus | 1 | 0   | 0  | 0   | 0    | 0    |
| 20   | <i>Methylothera</i>       | genus | 1 | 0   | 0  | 0   | 0    | 0    |
| 373  | <i>Bilophila</i>          | genus | 1 | 0   | 0  | 0   | 0    | 0    |
| 1254 | <i>Lactonifactor</i>      | genus | 1 | 0   | 0  | 0   | 0    | 0    |
| 2636 | <i>Methanobrevibacter</i> | genus | 1 | 0   | 0  | 0   | 0    | 0    |
| 369  | <i>Enterococcus</i>       | genus | 0 | 292 | 0  | 655 | 3645 | 2123 |
| 2378 | <i>Bradyrhizobium</i>     | genus | 0 | 60  | 29 | 41  | 105  | 0    |
| 1656 | <i>Amaricoccus</i>        | genus | 0 | 32  | 0  | 0   | 6    | 0    |
| 2449 | <i>Caulobacter</i>        | genus | 0 | 30  | 7  | 5   | 40   | 0    |
| 116  | <i>Brachybacterium</i>    | genus | 0 | 28  | 0  | 0   | 13   | 0    |
| 2903 | <i>Brevundimonas</i>      | genus | 0 | 21  | 5  | 11  | 2    | 0    |
| 2397 | <i>Ralstonia</i>          | genus | 0 | 16  | 4  | 6   | 13   | 1    |
| 1242 | <i>Hyphomicrobium</i>     | genus | 0 | 16  | 2  | 5   | 6    | 0    |
| 2311 | <i>Delftia</i>            | genus | 0 | 12  | 4  | 2   | 16   | 0    |
| 2327 | <i>Labrys</i>             | genus | 0 | 12  | 8  | 14  | 8    | 0    |
| 2492 | <i>Citrobacter</i>        | genus | 0 | 10  | 0  | 3   | 0    | 0    |
| 457  | <i>Xanthomonas</i>        | genus | 0 | 10  | 8  | 0   | 0    | 0    |
| 48   | <i>Bacillus</i>           | genus | 0 | 9   | 0  | 29  | 0    | 5    |
| 2672 | <i>Dietzia</i>            | genus | 0 | 8   | 2  | 1   | 18   | 0    |
| 108  | <i>Aquabacterium</i>      | genus | 0 | 8   | 5  | 15  | 15   | 0    |
| 653  | <i>Arthrobacter</i>       | genus | 0 | 5   | 6  | 5   | 18   | 0    |
| 2678 | <i>Cloacibacterium</i>    | genus | 0 | 5   | 0  | 2   | 0    | 0    |
| 2485 | <i>Conchiformibius</i>    | genus | 0 | 5   | 0  | 0   | 0    | 0    |
| 2615 | <i>Rubellimicrobium</i>   | genus | 0 | 4   | 0  | 3   | 1    | 0    |
| 2634 | <i>Nocardioides</i>       | genus | 0 | 4   | 4  | 4   | 0    | 0    |
| 2450 | <i>Agrococcus</i>         | genus | 0 | 4   | 0  | 1   | 0    | 0    |
| 2960 | <i>Aggregatibacter</i>    | genus | 0 | 4   | 0  | 0   | 0    | 0    |

|      |                           |       |   |   |   |   |    |   |
|------|---------------------------|-------|---|---|---|---|----|---|
| 1237 | <i>Ochrobactrum</i>       | genus | 0 | 3 | 2 | 1 | 18 | 0 |
| 1234 | <i>Campylobacter</i>      | genus | 0 | 3 | 0 | 1 | 3  | 0 |
| 1247 | <i>Kocuria</i>            | genus | 0 | 3 | 3 | 0 | 1  | 0 |
| 2347 | <i>Kytococcus</i>         | genus | 0 | 3 | 1 | 3 | 0  | 0 |
| 2517 | <i>Roseomonas</i>         | genus | 0 | 3 | 5 | 1 | 0  | 0 |
| 472  | <i>Proteus</i>            | genus | 0 | 3 | 0 | 0 | 0  | 0 |
| 802  | <i>Xenophilus</i>         | genus | 0 | 3 | 0 | 0 | 0  | 0 |
| 1903 | <i>Alkaliphilus</i>       | genus | 0 | 3 | 0 | 0 | 0  | 0 |
| 1166 | <i>Luteococcus</i>        | genus | 0 | 3 | 0 | 0 | 0  | 0 |
| 2335 | <i>Chlorophyta</i>        | genus | 0 | 3 | 0 | 0 | 0  | 0 |
| 2419 | <i>Leptotrichia</i>       | genus | 0 | 2 | 3 | 1 | 8  | 0 |
| 2715 | <i>Terrimonas</i>         | genus | 0 | 2 | 1 | 0 | 5  | 0 |
| 285  | <i>Megamonas</i>          | genus | 0 | 2 | 0 | 1 | 3  | 0 |
| 609  | <i>Lysobacter</i>         | genus | 0 | 2 | 0 | 0 | 1  | 0 |
| 1830 | <i>Ruegeria</i>           | genus | 0 | 2 | 0 | 0 | 0  | 0 |
| 1670 | <i>Desemzia</i>           | genus | 0 | 2 | 0 | 0 | 0  | 0 |
| 1214 | <i>Thermicanus</i>        | genus | 0 | 2 | 0 | 0 | 0  | 0 |
| 2324 | <i>Knoellia</i>           | genus | 0 | 2 | 0 | 0 | 0  | 0 |
| 2293 | <i>Sphingobacterium</i>   | genus | 0 | 2 | 0 | 0 | 0  | 0 |
| 2794 | <i>Rhodococcus</i>        | genus | 0 | 1 | 2 | 2 | 13 | 0 |
| 496  | <i>Moraxella</i>          | genus | 0 | 1 | 0 | 0 | 7  | 0 |
| 2639 | <i>Aeromonas</i>          | genus | 0 | 1 | 1 | 1 | 5  | 0 |
| 2565 | <i>Chryseobacterium</i>   | genus | 0 | 1 | 0 | 0 | 2  | 0 |
| 2435 | <i>Thermomonas</i>        | genus | 0 | 1 | 0 | 1 | 1  | 0 |
| 2622 | <i>Flavisolibacter</i>    | genus | 0 | 1 | 0 | 1 | 0  | 0 |
| 607  | <i>Streptomyces</i>       | genus | 0 | 1 | 3 | 0 | 0  | 0 |
| 1667 | <i>Blastococcus</i>       | genus | 0 | 1 | 1 | 0 | 0  | 0 |
| 891  | <i>Actinobacillus</i>     | genus | 0 | 1 | 0 | 0 | 0  | 0 |
| 914  | <i>Rheinheimera</i>       | genus | 0 | 1 | 0 | 0 | 0  | 0 |
| 1159 | <i>Asticcacaulis</i>      | genus | 0 | 1 | 0 | 0 | 0  | 0 |
| 1346 | <i>Burkholderia</i>       | genus | 0 | 1 | 0 | 0 | 0  | 0 |
| 2298 | <i>Catonella</i>          | genus | 0 | 1 | 0 | 0 | 0  | 0 |
| 2451 | <i>Acidaminococcus</i>    | genus | 0 | 1 | 0 | 0 | 0  | 0 |
| 2490 | <i>Propionimicrobium</i>  | genus | 0 | 1 | 0 | 0 | 0  | 0 |
| 2141 | <i>Ornithinimicrobium</i> | genus | 0 | 1 | 0 | 0 | 0  | 0 |
| 2169 | <i>Pseudonocardia</i>     | genus | 0 | 1 | 0 | 0 | 0  | 0 |
| 2963 | <i>Arcticibacter</i>      | genus | 0 | 1 | 0 | 0 | 0  | 0 |
| 2528 | <i>Adhaeribacter</i>      | genus | 0 | 1 | 0 | 0 | 0  | 0 |
| 2454 | <i>Bergeyella</i>         | genus | 0 | 1 | 0 | 0 | 0  | 0 |
| 2671 | <i>Gp10</i>               | genus | 0 | 1 | 0 | 0 | 0  | 0 |
| 2463 | <i>Cellulosilyticum</i>   | genus | 0 | 0 | 0 | 0 | 0  | 3 |
| 2564 | <i>Salmonella</i>         | genus | 0 | 0 | 0 | 0 | 0  | 2 |
| 2568 | <i>Dermabacter</i>        | genus | 0 | 0 | 0 | 0 | 0  | 1 |
| 2487 | <i>Alloprevotella</i>     | genus | 0 | 0 | 0 | 0 | 14 | 0 |
| 2682 | <i>Duganella</i>          | genus | 0 | 0 | 0 | 0 | 5  | 0 |
| 443  | <i>Laceyella</i>          | genus | 0 | 0 | 0 | 0 | 4  | 0 |

|      |                                            |       |      |    |    |    |   |   |
|------|--------------------------------------------|-------|------|----|----|----|---|---|
| 2676 | <i>Phocaeicola</i>                         | genus | 0    | 0  | 0  | 0  | 3 | 0 |
| 454  | <i>Mycobacterium</i>                       | genus | 0    | 0  | 4  | 1  | 2 | 0 |
| 2188 | <i>Cellulomonas</i>                        | genus | 0    | 0  | 0  | 0  | 2 | 0 |
| 375  | <i>Pedobacter</i>                          | genus | 0    | 0  | 0  | 0  | 2 | 0 |
| 2434 | <i>Variovorax</i>                          | genus | 0    | 0  | 0  | 0  | 1 | 0 |
| 2677 | <i>Schlegelella</i>                        | genus | 0    | 0  | 0  | 0  | 1 | 0 |
| 368  | <i>Naxibacter</i>                          | genus | 0    | 0  | 0  | 0  | 1 | 0 |
| 2513 | <i>Dolosigranulum</i>                      | genus | 0    | 0  | 0  | 0  | 1 | 0 |
| 366  | <i>Selenomonas</i>                         | genus | 0    | 0  | 0  | 0  | 1 | 0 |
| 2567 | <i>Aequorivita</i>                         | genus | 0    | 0  | 0  | 0  | 1 | 0 |
| 2566 | <i>Sneathia</i>                            | genus | 0    | 0  | 0  | 0  | 1 | 0 |
| 2491 | <i>Treponema</i>                           | genus | 0    | 0  | 0  | 0  | 1 | 0 |
| 1929 | <i>Sphingopyxis</i>                        | genus | 0    | 0  | 0  | 23 | 0 | 0 |
| 437  | <i>Facklamia</i>                           | genus | 0    | 0  | 0  | 15 | 0 | 0 |
| 816  | <i>Helcococcus</i>                         | genus | 0    | 0  | 0  | 4  | 0 | 0 |
| 917  | <i>Bacillariophyta</i>                     | genus | 0    | 0  | 0  | 4  | 0 | 0 |
| 2399 | <i>Actinomycetospora</i>                   | genus | 0    | 0  | 3  | 3  | 0 | 0 |
| 367  | <i>Leadbetterella</i>                      | genus | 0    | 0  | 0  | 3  | 0 | 0 |
| 376  | <i>Nevskia</i>                             | genus | 0    | 0  | 0  | 2  | 0 | 0 |
| 1928 | <i>Aquicella</i>                           | genus | 0    | 0  | 0  | 2  | 0 | 0 |
| 1553 | <i>Comamonas</i>                           | genus | 0    | 0  | 0  | 2  | 0 | 0 |
| 2459 | <i>Jeotgalicoccus</i>                      | genus | 0    | 0  | 0  | 2  | 0 | 0 |
| 24   | <i>Exiguobacterium</i>                     | genus | 0    | 0  | 0  | 2  | 0 | 0 |
| 1916 | <i>Gaiella</i>                             | genus | 0    | 0  | 0  | 2  | 0 | 0 |
| 2883 | <i>Flavobacterium</i>                      | genus | 0    | 0  | 0  | 2  | 0 | 0 |
| 440  | <i>Hymenobacter</i>                        | genus | 0    | 0  | 5  | 1  | 0 | 0 |
| 1253 | <i>Yokenella</i>                           | genus | 0    | 0  | 0  | 1  | 0 | 0 |
| 1411 | <i>Bosea</i>                               | genus | 0    | 0  | 0  | 1  | 0 | 0 |
| 2631 | <i>Devosia</i>                             | genus | 0    | 0  | 0  | 1  | 0 | 0 |
| 438  | <i>Blastomonas</i>                         | genus | 0    | 0  | 0  | 1  | 0 | 0 |
| 1654 | <i>Shinella</i>                            | genus | 0    | 0  | 0  | 1  | 0 | 0 |
| 901  | <i>Paenibacillus</i>                       | genus | 0    | 0  | 0  | 1  | 0 | 0 |
| 1283 | <i>Johnsonella</i>                         | genus | 0    | 0  | 0  | 1  | 0 | 0 |
| 1408 | <i>Ethanoligenens</i>                      | genus | 0    | 0  | 0  | 1  | 0 | 0 |
| 2619 | <i>Parcubacteria_genera_incertae_sedis</i> | genus | 0    | 0  | 0  | 1  | 0 | 0 |
| 2059 | <i>Opitutus</i>                            | genus | 0    | 0  | 0  | 1  | 0 | 0 |
| 994  | <i>Haematobacter</i>                       | genus | 0    | 0  | 12 | 0  | 0 | 0 |
| 1646 | <i>Pantoea</i>                             | genus | 0    | 0  | 10 | 0  | 0 | 0 |
| 872  | <i>Aurantimonas</i>                        | genus | 0    | 0  | 4  | 0  | 0 | 0 |
| 269  | <i>Friedmanniella</i>                      | genus | 0    | 0  | 4  | 0  | 0 | 0 |
| 993  | <i>Gemmobacter</i>                         | genus | 0    | 0  | 1  | 0  | 0 | 0 |
| 887  | <i>Afipia</i>                              | genus | 0    | 0  | 1  | 0  | 0 | 0 |
| 92   | <i>Kineococcus</i>                         | genus | 0    | 0  | 1  | 0  | 0 | 0 |
| 397  | <i>Solirubrobacter</i>                     | genus | 0    | 0  | 1  | 0  | 0 | 0 |
| -    |                                            |       |      |    |    |    |   |   |
| 1618 | <i>unclassified_Ruminococcaceae</i>        |       | 6973 | 14 | 0  | 1  | 0 | 1 |
| -1   | <i>unclassified_Lachnospiraceae</i>        |       | 5953 | 4  | 0  | 0  | 8 | 0 |



|      |                                         |      |      |      |      |     |      |
|------|-----------------------------------------|------|------|------|------|-----|------|
| -2   | <i>unclassified_Clostridiales</i>       | 2727 | 6    | 1    | 3    | 12  | 13   |
| -568 | <i>unclassified_Bacteria</i>            | 2263 | 513  | 3887 | 1619 | 287 | 354  |
| -941 | <i>unclassified_Erysipelotrichaceae</i> | 2116 | 2    | 0    | 0    | 1   | 0    |
| -871 | <i>unclassified_Coriobacteriaceae</i>   | 869  | 0    | 0    | 0    | 2   | 0    |
| -843 | <i>unclassified_Firmicutes</i>          | 656  | 1    | 4    | 10   | 43  | 178  |
| -    |                                         |      |      |      |      |     |      |
| 1502 | <i>unclassified_Enterobacteriaceae</i>  | 459  | 1906 | 1160 | 512  | 87  | 2659 |

**Supplementary Table 2.** Relative abundances of organisms based on phylogenetic identification of 16S rRNA gene sequences using RDP Classifier (<https://rdp.cme.msu.edu/>).

| taxid | name                                     | rank   | Mother | Amniotic | Placenta | Colostrum | Meconium | Infant |
|-------|------------------------------------------|--------|--------|----------|----------|-----------|----------|--------|
| 1     | Bacteria                                 | domain | 100    | 100      | 100      | 100       | 100      | 100    |
| 1617  | <i>Lachnospiraceae</i>                   | family | 30.96  | 0.02     | 0.00     | 0.09      | 0.04     | 0.01   |
| 1763  | <i>Ruminococcaceae</i>                   | family | 20.82  | 0.04     | 0.00     | 0.04      | 0.02     | 0.00   |
| 264   | <i>Streptococcaceae</i>                  | family | 11.01  | 0.45     | 0.12     | 16.62     | 1.05     | 23.88  |
| 1158  | <i>Coriobacteriaceae</i>                 | family | 9.47   | 0.00     | 0.00     | 0.01      | 0.02     | 0.04   |
| 2363  | <i>Erysipelotrichaceae</i>               | family | 6.04   | 0.00     | 0.00     | 0.01      | 0.01     | 0.00   |
| 567   | <i>Bacteroidaceae</i>                    | family | 4.19   | 0.01     | 0.01     | 0.01      | 0.00     | 0.00   |
| 2357  | <i>Peptostreptococcaceae</i>             | family | 1.30   | 0.02     | 0.00     | 0.03      | 0.10     | 0.41   |
| 1721  | <i>Enterobacteriaceae</i>                | family | 1.23   | 83.00    | 78.18    | 40.50     | 0.40     | 5.36   |
| 1240  | <i>Veillonellaceae</i>                   | family | 1.17   | 0.04     | 0.04     | 0.26      | 0.36     | 44.17  |
| 2371  | <i>Clostridiaceae 1</i>                  | family | 0.49   | 0.01     | 0.00     | 0.01      | 0.71     | 1.87   |
| 927   | <i>Actinomycetaceae</i>                  | family | 0.44   | 0.05     | 0.01     | 0.16      | 0.03     | 2.62   |
| 940   | <i>Porphyromonadaceae</i>                | family | 0.36   | 0.02     | 0.02     | 0.04      | 0.04     | 0.00   |
| 2367  | <i>Clostridiales_Incertae Sedis XIII</i> | family | 0.23   | 0.00     | 0.01     | 0.01      | 0.00     | 0.00   |
| 36    | <i>Moraxellaceae</i>                     | family | 0.22   | 2.90     | 0.04     | 1.71      | 0.12     | 0.00   |
| 886   | <i>Rikenellaceae</i>                     | family | 0.21   | 0.00     | 0.00     | 0.00      | 0.00     | 0.00   |
| 2320  | <i>Verrucomicrobiaceae</i>               | family | 0.20   | 0.00     | 0.00     | 0.00      | 0.00     | 0.00   |
| 1206  | <i>Prevotellaceae</i>                    | family | 0.17   | 0.02     | 0.02     | 0.21      | 0.10     | 0.00   |
| 190   | <i>Propionibacteriaceae</i>              | family | 0.14   | 2.31     | 1.83     | 3.88      | 2.04     | 0.20   |
| 844   | <i>Clostridiales_Incertae Sedis XI</i>   | family | 0.14   | 0.03     | 0.04     | 0.13      | 0.08     | 0.00   |
| 1834  | <i>Sphingomonadaceae</i>                 | family | 0.11   | 1.98     | 0.24     | 0.74      | 0.38     | 0.00   |
| 2714  | <i>Lactobacillaceae</i>                  | family | 0.11   | 1.20     | 0.84     | 2.95      | 2.38     | 0.74   |
| 1814  | <i>Carnobacteriaceae</i>                 | family | 0.09   | 0.04     | 0.00     | 0.25      | 0.05     | 0.00   |
| 1746  | <i>Bifidobacteriaceae</i>                | family | 0.08   | 0.00     | 0.00     | 0.01      | 0.00     | 0.87   |
| 979   | <i>Eubacteriaceae</i>                    | family | 0.05   | 0.00     | 0.00     | 0.01      | 0.02     | 0.00   |
| 1286  | <i>Phyllobacteriaceae</i>                | family | 0.05   | 0.38     | 0.14     | 0.33      | 1.09     | 0.00   |
| 2290  | <i>Leuconostocaceae</i>                  | family | 0.04   | 0.35     | 0.00     | 0.00      | 0.06     | 0.00   |
| 114   | <i>Acidaminococcaceae</i>                | family | 0.04   | 0.00     | 0.00     | 0.00      | 0.00     | 0.00   |
| 1772  | <i>Methylobacteriaceae</i>               | family | 0.03   | 0.42     | 0.02     | 0.01      | 0.21     | 0.01   |
| 19    | <i>Anaeroplasmataceae</i>                | family | 0.03   | 0.00     | 0.00     | 0.00      | 0.00     | 0.00   |
| 2342  | <i>Corynebacteriaceae</i>                | family | 0.02   | 0.30     | 0.13     | 1.59      | 0.55     | 0.22   |
| 2484  | <i>Oxalobacteraceae</i>                  | family | 0.02   | 0.48     | 0.03     | 0.09      | 0.06     | 0.00   |
| 1195  | <i>Chitinophagaceae</i>                  | family | 0.01   | 0.83     | 0.52     | 1.98      | 3.37     | 0.00   |
| 2503  | <i>Micrococcaceae</i>                    | family | 0.01   | 0.13     | 0.09     | 0.24      | 0.18     | 0.08   |
| 908   | <i>Victivallaceae</i>                    | family | 0.01   | 0.00     | 0.00     | 0.00      | 0.00     | 0.00   |
| 2417  | <i>Comamonadaceae</i>                    | family | 0.01   | 0.20     | 0.09     | 0.29      | 0.22     | 0.00   |
| 966   | <i>Vibrionaceae</i>                      | family | 0.01   | 0.12     | 0.02     | 0.00      | 0.01     | 0.00   |
| 154   | <i>Bacillales_Incertae Sedis XI</i>      | family | 0.01   | 0.08     | 0.01     | 2.68      | 0.07     | 0.24   |
| 2264  | <i>Staphylococcaceae</i>                 | family | 0.01   | 0.20     | 0.26     | 6.19      | 63.32    | 13.11  |

|      |                                       |        |      |      |      |      |       |      |
|------|---------------------------------------|--------|------|------|------|------|-------|------|
| 470  | <i>Xanthomonadaceae</i>               | family | 0.01 | 0.12 | 0.05 | 0.21 | 0.14  | 0.00 |
| 2294 | <i>Chloroplast</i>                    | family | 0.01 | 0.12 | 0.14 | 0.20 | 0.05  | 0.00 |
| 132  | <i>Neisseriaceae</i>                  | family | 0.01 | 0.08 | 0.05 | 0.33 | 0.11  | 0.00 |
| 448  | <i>Pseudomonadaceae</i>               | family | 0.01 | 0.07 | 0.03 | 0.03 | 0.02  | 0.08 |
| 41   | <i>Sutterellaceae</i>                 | family | 0.01 | 0.00 | 0.00 | 0.00 | 0.00  | 0.00 |
| 1255 | <i>Pasteurellaceae</i>                | family | 0.01 | 0.11 | 0.05 | 0.96 | 0.23  | 1.50 |
| 2479 | <i>Pseudoalteromonadaceae</i>         | family | 0.01 | 0.00 | 0.00 | 0.00 | 0.00  | 0.00 |
| 2445 | <i>Synergistaceae</i>                 | family | 0.01 | 0.00 | 0.00 | 0.00 | 0.00  | 0.00 |
| 950  | <i>Bradyrhizobiaceae</i>              | family | 0.01 | 0.21 | 0.15 | 0.38 | 0.61  | 0.00 |
| 436  | <i>Desulfovibrionaceae</i>            | family | 0.01 | 0.00 | 0.00 | 0.00 | 0.00  | 0.00 |
| 2334 | <i>Rhodobacteraceae</i>               | family | 0.00 | 0.11 | 0.12 | 0.09 | 0.06  | 0.00 |
| 255  | <i>Aerococcaceae</i>                  | family | 0.00 | 0.02 | 0.00 | 0.10 | 0.01  | 0.00 |
| 2308 | <i>Planococcaceae</i>                 | family | 0.00 | 0.01 | 0.00 | 0.00 | 0.02  | 0.00 |
| 104  | <i>Fusobacteriaceae</i>               | family | 0.00 | 0.00 | 0.01 | 0.08 | 0.09  | 0.00 |
| 871  | <i>Incertae Sedis XI</i>              | family | 0.00 | 0.00 | 0.00 | 0.00 | 0.00  | 0.00 |
| 2377 | <i>Oceanospirillaceae</i>             | family | 0.00 | 0.49 | 0.02 | 0.01 | 6.44  | 0.02 |
| 898  | <i>Microbacteriaceae</i>              | family | 0.00 | 0.03 | 0.00 | 0.08 | 0.10  | 0.00 |
| 1479 | <i>Flavobacteriaceae</i>              | family | 0.00 | 0.02 | 0.01 | 0.06 | 0.03  | 0.00 |
| 648  | <i>Listeriaceae</i>                   | family | 0.00 | 0.02 | 0.02 | 0.00 | 0.02  | 0.00 |
| 1070 | <i>Intrasporangiaceae</i>             | family | 0.00 | 0.02 | 0.00 | 0.00 | 0.02  | 0.00 |
| 119  | <i>Rhizobiaceae</i>                   | family | 0.00 | 0.02 | 0.02 | 0.00 | 0.08  | 0.00 |
| 425  | <i>Brevibacteriaceae</i>              | family | 0.00 | 0.01 | 0.00 | 0.00 | 0.01  | 0.00 |
| 2384 | <i>Brucellaceae</i>                   | family | 0.00 | 0.01 | 0.01 | 0.01 | 0.07  | 0.00 |
| 792  | <i>Shewanellaceae</i>                 | family | 0.00 | 0.00 | 0.00 | 0.03 | 0.00  | 0.00 |
| 2288 | <i>Enterococcaceae</i>                | family | 0.00 | 0.00 | 0.00 | 0.00 | 0.00  | 0.00 |
| 354  | <i>Caulobacteraceae</i>               | family | 0.00 | 0.00 | 0.00 | 0.00 | 0.00  | 0.00 |
| 365  | <i>Dermabacteraceae</i>               | family | 0.00 | 0.69 | 0.00 | 4.13 | 11.23 | 3.01 |
| 49   | <i>Burkholderiaceae</i>               | family | 0.00 | 0.13 | 0.05 | 0.13 | 0.13  | 0.00 |
| 1508 | <i>Hyphomicrobiaceae</i>              | family | 0.00 | 0.07 | 0.00 | 0.00 | 0.04  | 0.00 |
| 1557 | <i>Xanthobacteraceae</i>              | family | 0.00 | 0.04 | 0.02 | 0.04 | 0.04  | 0.00 |
| 595  | <i>Bacillaceae 1</i>                  | family | 0.00 | 0.04 | 0.01 | 0.04 | 0.02  | 0.00 |
| 281  | <i>Dietziaceae</i>                    | family | 0.00 | 0.03 | 0.03 | 0.09 | 0.02  | 0.00 |
| 2724 | <i>Burkholderiales_incertae_sedis</i> | family | 0.00 | 0.02 | 0.00 | 0.30 | 0.00  | 0.01 |
| 313  | <i>Nocardioideaceae</i>               | family | 0.00 | 0.02 | 0.01 | 0.01 | 0.06  | 0.00 |
| 70   | <i>Aurantimonadaceae</i>              | family | 0.00 | 0.02 | 0.02 | 0.10 | 0.05  | 0.00 |
| 1567 | <i>Campylobacteraceae</i>             | family | 0.00 | 0.02 | 0.02 | 0.03 | 0.00  | 0.00 |
| 1177 | <i>Sphingobacteriaceae</i>            | family | 0.00 | 0.01 | 0.02 | 0.00 | 0.00  | 0.00 |
| 827  | <i>Acetobacteraceae</i>               | family | 0.00 | 0.01 | 0.00 | 0.01 | 0.01  | 0.00 |
| 705  | <i>Dermacoccaceae</i>                 | family | 0.00 | 0.01 | 0.00 | 0.00 | 0.01  | 0.00 |
| 1252 | <i>Clostridiaceae 2</i>               | family | 0.00 | 0.01 | 0.03 | 0.02 | 0.00  | 0.00 |
| 2395 | <i>Leptotrichiaceae</i>               | family | 0.00 | 0.01 | 0.00 | 0.02 | 0.00  | 0.00 |
| 2325 | <i>Bacillales_Incertae Sedis X</i>    | family | 0.00 | 0.01 | 0.00 | 0.00 | 0.00  | 0.00 |
| 456  | <i>Nocardiaceae</i>                   | family | 0.00 | 0.00 | 0.02 | 0.01 | 0.03  | 0.00 |
| 46   | <i>Aeromonadaceae</i>                 | family | 0.00 | 0.00 | 0.00 | 0.00 | 0.00  | 0.00 |
| 1152 | <i>Cytophagaceae</i>                  | family | 0.00 | 0.00 | 0.01 | 0.01 | 0.04  | 0.00 |

|      |                                       |        |       |      |      |       |      |       |
|------|---------------------------------------|--------|-------|------|------|-------|------|-------|
| 106  | <i>Pseudonocardiaceae</i>             | family | 0.00  | 0.00 | 0.00 | 0.01  | 0.02 | 0.00  |
| 1895 | <i>Streptomycetaceae</i>              | family | 0.00  | 0.00 | 0.02 | 0.03  | 0.00 | 0.00  |
| 1827 | <i>Geodermatophilaceae</i>            | family | 0.00  | 0.00 | 0.01 | 0.02  | 0.00 | 0.00  |
| 1669 | <i>Chromatiaceae</i>                  | family | 0.00  | 0.00 | 0.01 | 0.00  | 0.00 | 0.00  |
| 2292 | <i>Alcaligenaceae</i>                 | family | 0.00  | 0.00 | 0.00 | 0.00  | 0.00 | 0.00  |
| 2793 | <i>Planctomycetaceae</i>              | family | 0.00  | 0.00 | 0.00 | 0.00  | 0.00 | 0.00  |
| 2433 | <i>Caldilineaceae</i>                 | family | 0.00  | 0.00 | 0.00 | 0.00  | 0.00 | 0.00  |
| 1331 | <i>Thermoactinomycetaceae 1</i>       | family | 0.00  | 0.00 | 0.00 | 0.00  | 0.00 | 0.00  |
| 1455 | <i>Bacteroidales_incertae_sedis</i>   | family | 0.00  | 0.00 | 0.00 | 0.00  | 0.00 | 0.00  |
| 2297 | <i>Mycobacteriaceae</i>               | family | 0.00  | 0.00 | 0.00 | 0.00  | 0.01 | 0.00  |
| 2167 | <i>Erythrobacteraceae</i>             | family | 0.00  | 0.00 | 0.00 | 0.00  | 0.01 | 0.00  |
| 453  | <i>Cellulomonadaceae</i>              | family | 0.00  | 0.00 | 0.02 | 0.01  | 0.01 | 0.00  |
| 2187 | <i>Spirochaetaceae</i>                | family | 0.00  | 0.00 | 0.00 | 0.00  | 0.01 | 0.00  |
| 1927 | <i>Sinobacteraceae</i>                | family | 0.00  | 0.00 | 0.00 | 0.00  | 0.01 | 0.00  |
| 815  | <i>Coxiellaceae</i>                   | family | 0.00  | 0.00 | 0.00 | 0.00  | 0.00 | 0.00  |
| 1551 | <i>Bacillales_Incertae_Sedis_XII</i>  | family | 0.00  | 0.00 | 0.00 | 0.01  | 0.00 | 0.00  |
| 1909 | <i>Gaiellaceae</i>                    | family | 0.00  | 0.00 | 0.00 | 0.01  | 0.00 | 0.00  |
| 1407 | <i>Rhodocyclaceae</i>                 | family | 0.00  | 0.00 | 0.00 | 0.01  | 0.00 | 0.00  |
| 2627 | <i>Polyangiaceae</i>                  | family | 0.00  | 0.00 | 0.00 | 0.01  | 0.00 | 0.00  |
| 1280 | <i>Paenibacillaceae 1</i>             | family | 0.00  | 0.00 | 0.00 | 0.01  | 0.00 | 0.00  |
| 2057 | <i>Opitutaceae</i>                    | family | 0.00  | 0.00 | 0.00 | 0.01  | 0.00 | 0.00  |
| 90   | <i>Kineosporiaceae</i>                | family | 0.00  | 0.00 | 0.00 | 0.01  | 0.00 | 0.00  |
| 396  | <i>Solirubrobacteraceae</i>           | family | 0.00  | 0.00 | 0.00 | 0.01  | 0.00 | 0.00  |
| 1631 | <i>Streptococcus</i>                  | genus  | 0.00  | 0.00 | 0.00 | 0.00  | 0.00 | 0.00  |
| 1767 | <i>Blautia</i>                        | genus  | 0.00  | 0.00 | 0.00 | 0.00  | 0.00 | 0.00  |
| 274  | <i>Lachnospiraceae_incertae_sedis</i> | genus  | 10.64 | 0.36 | 0.11 | 16.57 | 0.88 | 23.87 |
| 1165 | <i>Collinsella</i>                    | genus  | 9.58  | 0.00 | 0.00 | 0.03  | 0.01 | 0.00  |
| 2364 | <i>Bacteroides</i>                    | genus  | 4.63  | 0.00 | 0.00 | 0.06  | 0.00 | 0.00  |
| 2362 | <i>Faecalibacterium</i>               | genus  | 4.26  | 0.00 | 0.00 | 0.01  | 0.01 | 0.00  |
| 1725 | <i>Ruminococcus</i>                   | genus  | 4.19  | 0.01 | 0.01 | 0.01  | 0.00 | 0.00  |
| 1246 | <i>Slackia</i>                        | genus  | 2.85  | 0.00 | 0.00 | 0.00  | 0.00 | 0.00  |
| 929  | <i>Ruminococcus2</i>                  | genus  | 2.69  | 0.00 | 0.00 | 0.01  | 0.01 | 0.00  |
| 2372 | <i>Roseburia</i>                      | genus  | 2.66  | 0.00 | 0.00 | 0.00  | 0.00 | 0.00  |
| 39   | <i>Oscillibacter</i>                  | genus  | 2.38  | 0.00 | 0.00 | 0.00  | 0.00 | 0.00  |
| 2369 | <i>Clostridium XI</i>                 | genus  | 1.84  | 0.00 | 0.00 | 0.00  | 0.00 | 0.00  |
| 1764 | <i>Dialister</i>                      | genus  | 1.54  | 0.00 | 0.00 | 0.01  | 0.00 | 0.00  |
| 946  | <i>Dorea</i>                          | genus  | 1.25  | 0.00 | 0.00 | 0.02  | 0.09 | 0.39  |
| 2322 | <i>Clostridium XVIII</i>              | genus  | 1.10  | 0.00 | 0.00 | 0.00  | 0.00 | 0.00  |
| 1161 | <i>Coproccoccus</i>                   | genus  | 0.92  | 0.00 | 0.00 | 0.00  | 0.00 | 0.00  |
| 1633 | <i>Eggerthella</i>                    | genus  | 0.80  | 0.00 | 0.00 | 0.00  | 0.00 | 0.00  |
| 1227 | <i>Catenibacterium</i>                | genus  | 0.78  | 0.00 | 0.00 | 0.00  | 0.00 | 0.00  |
| 892  | <i>Turcibacter</i>                    | genus  | 0.74  | 0.00 | 0.00 | 0.01  | 0.00 | 0.03  |
| 1823 | <i>Subdoligranulum</i>                | genus  | 0.57  | 0.00 | 0.00 | 0.00  | 0.00 | 0.00  |
| 2721 | <i>Actinomyces</i>                    | genus  | 0.48  | 0.00 | 0.00 | 0.00  | 0.00 | 0.00  |
| 2373 | <i>Clostridium sensu stricto</i>      | genus  | 0.43  | 0.00 | 0.00 | 0.00  | 0.00 | 0.00  |

|      |                                               |       |      |       |       |       |      |       |
|------|-----------------------------------------------|-------|------|-------|-------|-------|------|-------|
| 1771 | <i>Clostridium IV</i>                         | genus | 0.42 | 0.04  | 0.01  | 0.14  | 0.02 | 1.94  |
| 2291 | <i>Escherichia/Shigella</i>                   | genus | 0.40 | 0.00  | 0.00  | 0.01  | 0.52 | 1.55  |
| 984  | <i>Erysipelotrichaceae_incertae_sedis</i>     | genus | 0.37 | 0.00  | 0.00  | 0.00  | 0.00 | 0.00  |
| 847  | <i>Lactococcus</i>                            | genus | 0.36 | 0.17  | 0.24  | 0.71  | 0.12 | 1.58  |
| 1851 | <i>Flavonifractor</i>                         | genus | 0.36 | 0.00  | 0.00  | 0.00  | 0.01 | 0.00  |
| 196  | <i>Parabacteroides</i>                        | genus | 0.36 | 0.09  | 0.01  | 0.05  | 0.17 | 0.00  |
| 1308 | <i>Clostridium XIVa</i>                       | genus | 0.35 | 0.00  | 0.00  | 0.00  | 0.00 | 0.00  |
| 115  | <i>Alistipes</i>                              | genus | 0.28 | 0.00  | 0.00  | 0.00  | 0.00 | 0.00  |
| 1781 | <i>Akkermansia</i>                            | genus | 0.25 | 0.00  | 0.00  | 0.00  | 0.00 | 0.00  |
| 2368 | <i>Butyricoccus</i>                           | genus | 0.21 | 0.00  | 0.00  | 0.00  | 0.00 | 0.00  |
| 846  | <i>Prevotella</i>                             | genus | 0.20 | 0.00  | 0.00  | 0.00  | 0.00 | 0.00  |
| 199  | <i>Gordonibacter</i>                          | genus | 0.19 | 0.00  | 0.00  | 0.00  | 0.00 | 0.00  |
| 21   | <i>Anaerovorax</i>                            | genus | 0.17 | 0.01  | 0.01  | 0.08  | 0.04 | 0.00  |
| 2345 | <i>Propionibacterium</i>                      | genus | 0.16 | 0.00  | 0.00  | 0.00  | 0.00 | 0.00  |
| 1204 | <i>Enhydrobacter</i>                          | genus | 0.16 | 0.00  | 0.00  | 0.00  | 0.00 | 0.00  |
| 918  | <i>Sphingomonas</i>                           | genus | 0.14 | 2.30  | 1.81  | 3.88  | 2.04 | 0.20  |
| 1754 | <i>Lactobacillus</i>                          | genus | 0.14 | 2.52  | 0.00  | 0.41  | 0.03 | 0.00  |
| 1216 | <i>Granulicatella</i>                         | genus | 0.11 | 1.73  | 0.07  | 0.19  | 0.14 | 0.00  |
| 969  | <i>Bifidobacterium</i>                        | genus | 0.11 | 1.20  | 0.83  | 2.92  | 2.36 | 0.73  |
| 581  | <i>Pseudoflavonifractor</i>                   | genus | 0.09 | 0.04  | 0.00  | 0.25  | 0.04 | 0.00  |
| 2295 | <i>Clostridium XIVb</i>                       | genus | 0.08 | 0.00  | 0.00  | 0.01  | 0.00 | 0.87  |
| 1626 | <i>Saccharibacteria_genera_incertae_sedis</i> | genus | 0.08 | 0.00  | 0.00  | 0.00  | 0.00 | 0.00  |
| 1854 | <i>Atopobium</i>                              | genus | 0.07 | 0.00  | 0.00  | 0.00  | 0.00 | 0.00  |
| 2529 | <i>Peptoniphilus</i>                          | genus | 0.06 | 0.00  | 0.00  | 0.03  | 0.01 | 0.00  |
| 2268 | <i>Porphyromonas</i>                          | genus | 0.06 | 0.00  | 0.00  | 0.00  | 0.00 | 0.00  |
| 42   | <i>Psychrobacter</i>                          | genus | 0.05 | 0.01  | 0.00  | 0.01  | 0.01 | 0.00  |
| 1256 | <i>Coprobaecillus</i>                         | genus | 0.05 | 0.02  | 0.02  | 0.02  | 0.04 | 0.00  |
| 957  | <i>Leuconostoc</i>                            | genus | 0.05 | 0.08  | 0.01  | 0.04  | 0.00 | 0.00  |
| 445  | <i>Phascolarctobacterium</i>                  | genus | 0.04 | 0.00  | 0.00  | 0.01  | 0.00 | 0.00  |
| 175  | <i>Acinetobacter</i>                          | genus | 0.04 | 0.30  | 0.00  | 0.00  | 0.06 | 0.00  |
| 451  | <i>Enterobacter</i>                           | genus | 0.04 | 0.00  | 0.00  | 0.00  | 0.00 | 0.00  |
| 138  | <i>Veillonella</i>                            | genus | 0.04 | 0.28  | 0.03  | 1.26  | 0.06 | 0.00  |
| 2481 | <i>Adlercreutzia</i>                          | genus | 0.04 | 78.31 | 73.11 | 36.54 | 0.01 | 0.02  |
| 2418 | <i>Solobacterium</i>                          | genus | 0.04 | 0.02  | 0.03  | 0.25  | 0.34 | 44.15 |
| 192  | <i>Methylobacterium</i>                       | genus | 0.04 | 0.00  | 0.00  | 0.00  | 0.00 | 0.00  |
| 105  | <i>Mesorhizobium</i>                          | genus | 0.03 | 0.00  | 0.00  | 0.00  | 0.00 | 0.00  |
| 2341 | <i>Anaerococcus</i>                           | genus | 0.03 | 0.42  | 0.02  | 0.01  | 0.21 | 0.01  |
| 482  | <i>Corynebacterium</i>                        | genus | 0.03 | 0.21  | 0.07  | 0.21  | 0.77 | 0.00  |
| 1207 | <i>Massilia</i>                               | genus | 0.03 | 0.01  | 0.01  | 0.04  | 0.02 | 0.00  |
| 1296 | <i>Holdemania</i>                             | genus | 0.02 | 0.30  | 0.13  | 1.58  | 0.54 | 0.22  |
| 2421 | <i>Anaerotruncus</i>                          | genus | 0.02 | 0.47  | 0.01  | 0.08  | 0.04 | 0.00  |
| 1020 | <i>Asteroleplasma</i>                         | genus | 0.02 | 0.00  | 0.00  | 0.00  | 0.00 | 0.00  |
| 1043 | <i>Barnesiella</i>                            | genus | 0.02 | 0.00  | 0.00  | 0.00  | 0.00 | 0.00  |
| 261  | <i>Victivallis</i>                            | genus | 0.02 | 0.00  | 0.00  | 0.00  | 0.00 | 0.00  |
| 156  | <i>Rothia</i>                                 | genus | 0.01 | 0.00  | 0.00  | 0.00  | 0.00 | 0.00  |

|      |                            |       |      |      |      |      |       |       |
|------|----------------------------|-------|------|------|------|------|-------|-------|
| 1748 | <i>Negativicoccus</i>      | genus | 0.01 | 0.00 | 0.00 | 0.00 | 0.00  | 0.00  |
| 903  | <i>Klebsiella</i>          | genus | 0.01 | 0.04 | 0.00 | 0.11 | 0.01  | 0.08  |
| 2423 | <i>Moryella</i>            | genus | 0.01 | 0.00 | 0.00 | 0.00 | 0.01  | 0.00  |
| 1481 | <i>Gemmiger</i>            | genus | 0.01 | 0.00 | 0.00 | 0.01 | 0.00  | 0.00  |
| 195  | <i>Photobacterium</i>      | genus | 0.01 | 0.00 | 0.00 | 0.00 | 0.00  | 0.00  |
| 123  | <i>Gemella</i>             | genus | 0.01 | 0.00 | 0.00 | 0.00 | 0.00  | 0.00  |
| 26   | <i>Eubacterium</i>         | genus | 0.01 | 0.12 | 0.02 | 0.00 | 0.01  | 0.00  |
| 430  | <i>Anaerofustis</i>        | genus | 0.01 | 0.08 | 0.01 | 2.68 | 0.07  | 0.24  |
| 2488 | <i>Staphylococcus</i>      | genus | 0.01 | 0.00 | 0.00 | 0.01 | 0.02  | 0.00  |
| 1093 | <i>Streptophyta</i>        | genus | 0.01 | 0.00 | 0.00 | 0.00 | 0.00  | 0.00  |
| 2526 | <i>Stenotrophomonas</i>    | genus | 0.01 | 0.20 | 0.26 | 6.17 | 63.17 | 13.02 |
| 1651 | <i>Pseudomonas</i>         | genus | 0.01 | 0.11 | 0.14 | 0.18 | 0.05  | 0.00  |
| 1239 | <i>Fingoldia</i>           | genus | 0.01 | 0.07 | 0.02 | 0.11 | 0.14  | 0.00  |
| 2389 | <i>Asaccharobacter</i>     | genus | 0.01 | 0.06 | 0.03 | 0.03 | 0.02  | 0.06  |
| 271  | <i>Olsenella</i>           | genus | 0.01 | 0.01 | 0.02 | 0.05 | 0.05  | 0.00  |
| 2718 | <i>Anaeroplasma</i>        | genus | 0.01 | 0.00 | 0.00 | 0.00 | 0.00  | 0.00  |
| 794  | <i>Neisseria</i>           | genus | 0.01 | 0.00 | 0.00 | 0.00 | 0.00  | 0.00  |
| 800  | <i>Mogibacterium</i>       | genus | 0.01 | 0.00 | 0.00 | 0.00 | 0.00  | 0.00  |
| 583  | <i>Pseudalteromonas</i>    | genus | 0.01 | 0.07 | 0.03 | 0.32 | 0.09  | 0.00  |
| 479  | <i>Anaerostipes</i>        | genus | 0.01 | 0.00 | 0.01 | 0.01 | 0.00  | 0.00  |
| 2147 | <i>Mobiluncus</i>          | genus | 0.01 | 0.00 | 0.00 | 0.00 | 0.00  | 0.00  |
| 2660 | <i>Jonquetella</i>         | genus | 0.01 | 0.00 | 0.00 | 0.00 | 0.00  | 0.00  |
| 2626 | <i>Pelomonas</i>           | genus | 0.01 | 0.00 | 0.00 | 0.00 | 0.00  | 0.00  |
| 1845 | <i>Sediminibacterium</i>   | genus | 0.01 | 0.00 | 0.00 | 0.00 | 0.00  | 0.00  |
| 2340 | <i>Peptostreptococcus</i>  | genus | 0.01 | 0.15 | 0.07 | 0.25 | 0.16  | 0.00  |
| 1046 | <i>Sutterella</i>          | genus | 0.01 | 0.02 | 0.00 | 0.09 | 1.37  | 0.00  |
| 2355 | <i>Lachnoanaerobaculum</i> | genus | 0.01 | 0.01 | 0.00 | 0.01 | 0.00  | 0.00  |
| 2289 | <i>Odoribacter</i>         | genus | 0.01 | 0.00 | 0.00 | 0.00 | 0.00  | 0.00  |
| 139  | <i>Weissella</i>           | genus | 0.01 | 0.00 | 0.00 | 0.00 | 0.00  | 0.00  |
| 656  | <i>Acidovorax</i>          | genus | 0.01 | 0.00 | 0.00 | 0.00 | 0.00  | 0.00  |
| 2380 | <i>Paracoccus</i>          | genus | 0.00 | 0.05 | 0.00 | 0.00 | 0.00  | 0.00  |
| 357  | <i>Varibaculum</i>         | genus | 0.00 | 0.01 | 0.01 | 0.00 | 0.00  | 0.00  |
| 2679 | <i>Anaerofilum</i>         | genus | 0.00 | 0.01 | 0.04 | 0.07 | 0.02  | 0.00  |
| 54   | <i>Fusobacterium</i>       | genus | 0.00 | 0.01 | 0.00 | 0.01 | 0.00  | 0.00  |
| 1768 | <i>Parvimonas</i>          | genus | 0.00 | 0.01 | 0.00 | 0.01 | 0.00  | 0.00  |
| 1509 | <i>Actinobaculum</i>       | genus | 0.00 | 0.00 | 0.01 | 0.08 | 0.09  | 0.00  |
| 2662 | <i>Planomicrobium</i>      | genus | 0.00 | 0.00 | 0.01 | 0.01 | 0.00  | 0.00  |
| 481  | <i>Parasutterella</i>      | genus | 0.00 | 0.00 | 0.00 | 0.00 | 0.01  | 0.65  |
| 1852 | <i>Desulfovibrio</i>       | genus | 0.00 | 0.00 | 0.00 | 0.00 | 0.01  | 0.00  |
| 1558 | <i>Murdochiella</i>        | genus | 0.00 | 0.00 | 0.00 | 0.00 | 0.00  | 0.00  |
| 1637 | <i>Butyricimonas</i>       | genus | 0.00 | 0.00 | 0.00 | 0.00 | 0.00  | 0.00  |
| 2420 | <i>Marinomonas</i>         | genus | 0.00 | 0.00 | 0.00 | 0.00 | 0.00  | 0.00  |
| 573  | <i>Novosphingobium</i>     | genus | 0.00 | 0.00 | 0.00 | 0.00 | 0.00  | 0.00  |
| 378  | <i>Micrococcus</i>         | genus | 0.00 | 0.49 | 0.02 | 0.01 | 6.41  | 0.02  |
| 2629 | <i>Haemophilus</i>         | genus | 0.00 | 0.19 | 0.16 | 0.38 | 0.22  | 0.00  |

|      |                           |       |      |      |      |      |       |      |
|------|---------------------------|-------|------|------|------|------|-------|------|
| 322  | <i>Brochothrix</i>        | genus | 0.00 | 0.07 | 0.05 | 0.08 | 0.10  | 0.00 |
| 71   | <i>Rhizobium</i>          | genus | 0.00 | 0.04 | 0.02 | 0.24 | 0.15  | 0.78 |
| 1747 | <i>Microbacterium</i>     | genus | 0.00 | 0.02 | 0.02 | 0.00 | 0.02  | 0.00 |
| 1579 | <i>Janibacter</i>         | genus | 0.00 | 0.02 | 0.02 | 0.00 | 0.08  | 0.00 |
| 845  | <i>Brevibacterium</i>     | genus | 0.00 | 0.01 | 0.00 | 0.05 | 0.10  | 0.00 |
| 1196 | <i>Aerococcus</i>         | genus | 0.00 | 0.01 | 0.00 | 0.00 | 0.02  | 0.00 |
| 2461 | <i>Megasphaera</i>        | genus | 0.00 | 0.01 | 0.00 | 0.00 | 0.01  | 0.00 |
| 2514 | <i>Capnocytophaga</i>     | genus | 0.00 | 0.01 | 0.00 | 0.00 | 0.01  | 0.00 |
| 278  | <i>Abiotrophia</i>        | genus | 0.00 | 0.01 | 0.00 | 0.00 | 0.00  | 0.00 |
| 145  | <i>Shewanella</i>         | genus | 0.00 | 0.00 | 0.00 | 0.01 | 0.01  | 0.00 |
| 302  | <i>Sarcina</i>            | genus | 0.00 | 0.00 | 0.00 | 0.01 | 0.00  | 0.00 |
| 2899 | <i>Pluralibacter</i>      | genus | 0.00 | 0.00 | 0.00 | 0.03 | 0.00  | 0.00 |
| 596  | <i>Saccharofermentans</i> | genus | 0.00 | 0.00 | 0.00 | 0.00 | 0.00  | 0.00 |
| 477  | <i>Raoultella</i>         | genus | 0.00 | 0.00 | 0.00 | 0.00 | 0.00  | 0.00 |
| 2221 | <i>Daeguia</i>            | genus | 0.00 | 0.00 | 0.00 | 0.01 | 0.00  | 0.00 |
| 20   | <i>Methylothera</i>       | genus | 0.00 | 0.00 | 0.00 | 0.00 | 0.00  | 0.00 |
| 373  | <i>Bilophila</i>          | genus | 0.00 | 0.00 | 0.00 | 0.00 | 0.00  | 0.00 |
| 1254 | <i>Lactonifactor</i>      | genus | 0.00 | 0.00 | 0.00 | 0.00 | 0.00  | 0.00 |
| 2636 | <i>Methanobrevibacter</i> | genus | 0.00 | 0.00 | 0.00 | 0.00 | 0.00  | 0.00 |
| 369  | <i>Enterococcus</i>       | genus | 0.00 | 0.00 | 0.00 | 0.00 | 0.00  | 0.00 |
| 2378 | <i>Bradyrhizobium</i>     | genus | 0.00 | 0.00 | 0.00 | 0.00 | 0.00  | 0.00 |
| 1656 | <i>Amaricoccus</i>        | genus | 0.00 | 0.69 | 0.00 | 4.11 | 11.21 | 3.00 |
| 2449 | <i>Caulobacter</i>        | genus | 0.00 | 0.14 | 0.12 | 0.26 | 0.32  | 0.00 |
| 116  | <i>Brachybacterium</i>    | genus | 0.00 | 0.08 | 0.00 | 0.00 | 0.02  | 0.00 |
| 2903 | <i>Brevundimonas</i>      | genus | 0.00 | 0.07 | 0.03 | 0.03 | 0.12  | 0.00 |
| 2397 | <i>Ralstonia</i>          | genus | 0.00 | 0.07 | 0.00 | 0.00 | 0.04  | 0.00 |
| 1242 | <i>Hyphomicrobium</i>     | genus | 0.00 | 0.05 | 0.02 | 0.07 | 0.01  | 0.00 |
| 2311 | <i>Delftia</i>            | genus | 0.00 | 0.04 | 0.02 | 0.04 | 0.04  | 0.00 |
| 2327 | <i>Labrys</i>             | genus | 0.00 | 0.04 | 0.01 | 0.03 | 0.02  | 0.00 |
| 2492 | <i>Citrobacter</i>        | genus | 0.00 | 0.03 | 0.02 | 0.01 | 0.05  | 0.00 |
| 457  | <i>Xanthomonas</i>        | genus | 0.00 | 0.03 | 0.03 | 0.09 | 0.02  | 0.00 |
| 48   | <i>Bacillus</i>           | genus | 0.00 | 0.02 | 0.00 | 0.02 | 0.00  | 0.00 |
| 2672 | <i>Dietzia</i>            | genus | 0.00 | 0.02 | 0.03 | 0.00 | 0.00  | 0.00 |
| 108  | <i>Aquabacterium</i>      | genus | 0.00 | 0.02 | 0.00 | 0.18 | 0.00  | 0.01 |
| 653  | <i>Arthrobacter</i>       | genus | 0.00 | 0.02 | 0.01 | 0.01 | 0.06  | 0.00 |
| 2678 | <i>Cloacibacterium</i>    | genus | 0.00 | 0.02 | 0.02 | 0.09 | 0.05  | 0.00 |
| 2485 | <i>Conchiformibius</i>    | genus | 0.00 | 0.01 | 0.02 | 0.03 | 0.06  | 0.00 |
| 2615 | <i>Rubellimicrobium</i>   | genus | 0.00 | 0.01 | 0.00 | 0.01 | 0.00  | 0.00 |
| 2634 | <i>Nocardioides</i>       | genus | 0.00 | 0.01 | 0.00 | 0.00 | 0.00  | 0.00 |
| 2450 | <i>Agrococcus</i>         | genus | 0.00 | 0.01 | 0.00 | 0.02 | 0.00  | 0.00 |
| 2960 | <i>Aggregatibacter</i>    | genus | 0.00 | 0.01 | 0.02 | 0.03 | 0.00  | 0.00 |
| 1237 | <i>Ochrobactrum</i>       | genus | 0.00 | 0.01 | 0.00 | 0.01 | 0.00  | 0.00 |
| 1234 | <i>Campylobacter</i>      | genus | 0.00 | 0.01 | 0.00 | 0.00 | 0.00  | 0.00 |
| 1247 | <i>Kocuria</i>            | genus | 0.00 | 0.01 | 0.01 | 0.01 | 0.06  | 0.00 |
| 2347 | <i>Kytococcus</i>         | genus | 0.00 | 0.01 | 0.00 | 0.01 | 0.01  | 0.00 |

|      |                           |       |      |      |      |      |      |      |
|------|---------------------------|-------|------|------|------|------|------|------|
| 2517 | <i>Roseomonas</i>         | genus | 0.00 | 0.01 | 0.01 | 0.00 | 0.00 | 0.00 |
| 472  | <i>Proteus</i>            | genus | 0.00 | 0.01 | 0.00 | 0.02 | 0.00 | 0.00 |
| 802  | <i>Xenophilus</i>         | genus | 0.00 | 0.01 | 0.02 | 0.01 | 0.00 | 0.00 |
| 1903 | <i>Alkaliphilus</i>       | genus | 0.00 | 0.01 | 0.00 | 0.00 | 0.00 | 0.00 |
| 1166 | <i>Luteococcus</i>        | genus | 0.00 | 0.01 | 0.00 | 0.00 | 0.00 | 0.00 |
| 2335 | <i>Chlorophyta</i>        | genus | 0.00 | 0.01 | 0.00 | 0.00 | 0.00 | 0.00 |
| 2419 | <i>Leptotrichia</i>       | genus | 0.00 | 0.01 | 0.00 | 0.00 | 0.00 | 0.00 |
| 2715 | <i>Terrimonas</i>         | genus | 0.00 | 0.01 | 0.00 | 0.00 | 0.00 | 0.00 |
| 285  | <i>Megamonas</i>          | genus | 0.00 | 0.00 | 0.01 | 0.01 | 0.02 | 0.00 |
| 609  | <i>Lysobacter</i>         | genus | 0.00 | 0.00 | 0.00 | 0.00 | 0.02 | 0.00 |
| 1830 | <i>Ruegeria</i>           | genus | 0.00 | 0.00 | 0.00 | 0.01 | 0.01 | 0.00 |
| 1670 | <i>Desemzia</i>           | genus | 0.00 | 0.00 | 0.00 | 0.00 | 0.00 | 0.00 |
| 1214 | <i>Thermicanus</i>        | genus | 0.00 | 0.00 | 0.00 | 0.00 | 0.00 | 0.00 |
| 2324 | <i>Knoellia</i>           | genus | 0.00 | 0.00 | 0.00 | 0.00 | 0.00 | 0.00 |
| 2293 | <i>Sphingobacterium</i>   | genus | 0.00 | 0.00 | 0.00 | 0.00 | 0.00 | 0.00 |
| 2794 | <i>Rhodococcus</i>        | genus | 0.00 | 0.00 | 0.00 | 0.00 | 0.00 | 0.00 |
| 496  | <i>Moraxella</i>          | genus | 0.00 | 0.00 | 0.00 | 0.00 | 0.00 | 0.00 |
| 2639 | <i>Aeromonas</i>          | genus | 0.00 | 0.00 | 0.01 | 0.01 | 0.04 | 0.00 |
| 2565 | <i>Chryseobacterium</i>   | genus | 0.00 | 0.00 | 0.00 | 0.00 | 0.02 | 0.00 |
| 2435 | <i>Thermomonas</i>        | genus | 0.00 | 0.00 | 0.00 | 0.01 | 0.02 | 0.00 |
| 2622 | <i>Flavisolibacter</i>    | genus | 0.00 | 0.00 | 0.00 | 0.00 | 0.01 | 0.00 |
| 607  | <i>Streptomyces</i>       | genus | 0.00 | 0.00 | 0.00 | 0.01 | 0.00 | 0.00 |
| 1667 | <i>Blastococcus</i>       | genus | 0.00 | 0.00 | 0.00 | 0.01 | 0.00 | 0.00 |
| 891  | <i>Actinobacillus</i>     | genus | 0.00 | 0.00 | 0.01 | 0.00 | 0.00 | 0.00 |
| 914  | <i>Rheinheimera</i>       | genus | 0.00 | 0.00 | 0.00 | 0.00 | 0.00 | 0.00 |
| 1159 | <i>Asticcacaulis</i>      | genus | 0.00 | 0.00 | 0.00 | 0.00 | 0.00 | 0.00 |
| 1346 | <i>Burkholderia</i>       | genus | 0.00 | 0.00 | 0.00 | 0.00 | 0.00 | 0.00 |
| 2298 | <i>Catonella</i>          | genus | 0.00 | 0.00 | 0.00 | 0.00 | 0.00 | 0.00 |
| 2451 | <i>Acidaminococcus</i>    | genus | 0.00 | 0.00 | 0.00 | 0.00 | 0.00 | 0.00 |
| 2490 | <i>Propionimicrobium</i>  | genus | 0.00 | 0.00 | 0.00 | 0.00 | 0.00 | 0.00 |
| 2141 | <i>Ornithinimicrobium</i> | genus | 0.00 | 0.00 | 0.00 | 0.00 | 0.00 | 0.00 |
| 2169 | <i>Pseudonocardia</i>     | genus | 0.00 | 0.00 | 0.00 | 0.00 | 0.00 | 0.00 |
| 2963 | <i>Arcticibacter</i>      | genus | 0.00 | 0.00 | 0.00 | 0.00 | 0.00 | 0.00 |
| 2528 | <i>Adhaeribacter</i>      | genus | 0.00 | 0.00 | 0.00 | 0.00 | 0.00 | 0.00 |
| 2454 | <i>Bergeyella</i>         | genus | 0.00 | 0.00 | 0.00 | 0.00 | 0.00 | 0.00 |
| 2671 | <i>Gp10</i>               | genus | 0.00 | 0.00 | 0.00 | 0.00 | 0.00 | 0.00 |
| 2463 | <i>Cellulosilyticum</i>   | genus | 0.00 | 0.00 | 0.00 | 0.00 | 0.00 | 0.00 |
| 2564 | <i>Salmonella</i>         | genus | 0.00 | 0.00 | 0.00 | 0.00 | 0.00 | 0.00 |
| 2568 | <i>Dermabacter</i>        | genus | 0.00 | 0.00 | 0.00 | 0.00 | 0.00 | 0.00 |
| 2487 | <i>Alloprevotella</i>     | genus | 0.00 | 0.00 | 0.00 | 0.00 | 0.00 | 0.00 |
| 2682 | <i>Duganella</i>          | genus | 0.00 | 0.00 | 0.00 | 0.00 | 0.00 | 0.00 |
| 443  | <i>Laceyella</i>          | genus | 0.00 | 0.00 | 0.00 | 0.00 | 0.04 | 0.00 |
| 2676 | <i>Phocaeicola</i>        | genus | 0.00 | 0.00 | 0.00 | 0.00 | 0.02 | 0.00 |
| 454  | <i>Mycobacterium</i>      | genus | 0.00 | 0.00 | 0.00 | 0.00 | 0.01 | 0.00 |
| 2188 | <i>Cellulomonas</i>       | genus | 0.00 | 0.00 | 0.00 | 0.00 | 0.01 | 0.00 |



|      |                                            |       |       |      |      |      |      |      |
|------|--------------------------------------------|-------|-------|------|------|------|------|------|
| 375  | <i>Pedobacter</i>                          | genus | 0.00  | 0.00 | 0.02 | 0.01 | 0.01 | 0.00 |
| 2434 | <i>Variovorax</i>                          | genus | 0.00  | 0.00 | 0.00 | 0.00 | 0.01 | 0.00 |
| 2677 | <i>Schlegelella</i>                        | genus | 0.00  | 0.00 | 0.00 | 0.00 | 0.01 | 0.00 |
| 368  | <i>Naxibacter</i>                          | genus | 0.00  | 0.00 | 0.00 | 0.00 | 0.00 | 0.00 |
| 2513 | <i>Dolosigranulum</i>                      | genus | 0.00  | 0.00 | 0.00 | 0.00 | 0.00 | 0.00 |
| 366  | <i>Selenomonas</i>                         | genus | 0.00  | 0.00 | 0.00 | 0.00 | 0.00 | 0.00 |
| 2567 | <i>Aequorivita</i>                         | genus | 0.00  | 0.00 | 0.00 | 0.00 | 0.00 | 0.00 |
| 2566 | <i>Sneathia</i>                            | genus | 0.00  | 0.00 | 0.00 | 0.00 | 0.00 | 0.00 |
| 2491 | <i>Treponema</i>                           | genus | 0.00  | 0.00 | 0.00 | 0.00 | 0.00 | 0.00 |
| 1929 | <i>Sphingopyxis</i>                        | genus | 0.00  | 0.00 | 0.00 | 0.00 | 0.00 | 0.00 |
| 437  | <i>Facklamia</i>                           | genus | 0.00  | 0.00 | 0.00 | 0.00 | 0.00 | 0.00 |
| 816  | <i>Helcococcus</i>                         | genus | 0.00  | 0.00 | 0.00 | 0.14 | 0.00 | 0.00 |
| 917  | <i>Bacillariophyta</i>                     | genus | 0.00  | 0.00 | 0.00 | 0.09 | 0.00 | 0.00 |
| 2399 | <i>Actinomycetospora</i>                   | genus | 0.00  | 0.00 | 0.00 | 0.03 | 0.00 | 0.00 |
| 367  | <i>Leadbetterella</i>                      | genus | 0.00  | 0.00 | 0.00 | 0.03 | 0.00 | 0.00 |
| 376  | <i>Nevskia</i>                             | genus | 0.00  | 0.00 | 0.01 | 0.02 | 0.00 | 0.00 |
| 1928 | <i>Aquicella</i>                           | genus | 0.00  | 0.00 | 0.00 | 0.02 | 0.00 | 0.00 |
| 1553 | <i>Comamonas</i>                           | genus | 0.00  | 0.00 | 0.00 | 0.01 | 0.00 | 0.00 |
| 2459 | <i>Jeotgalicoccus</i>                      | genus | 0.00  | 0.00 | 0.00 | 0.01 | 0.00 | 0.00 |
| 24   | <i>Exiguobacterium</i>                     | genus | 0.00  | 0.00 | 0.00 | 0.01 | 0.00 | 0.00 |
| 1916 | <i>Gaiella</i>                             | genus | 0.00  | 0.00 | 0.00 | 0.01 | 0.00 | 0.00 |
| 2883 | <i>Flavobacterium</i>                      | genus | 0.00  | 0.00 | 0.00 | 0.01 | 0.00 | 0.00 |
| 440  | <i>Hymenobacter</i>                        | genus | 0.00  | 0.00 | 0.00 | 0.01 | 0.00 | 0.00 |
| 1253 | <i>Yokenella</i>                           | genus | 0.00  | 0.00 | 0.00 | 0.01 | 0.00 | 0.00 |
| 1411 | <i>Bosea</i>                               | genus | 0.00  | 0.00 | 0.02 | 0.01 | 0.00 | 0.00 |
| 2631 | <i>Devosia</i>                             | genus | 0.00  | 0.00 | 0.00 | 0.01 | 0.00 | 0.00 |
| 438  | <i>Blastomonas</i>                         | genus | 0.00  | 0.00 | 0.00 | 0.01 | 0.00 | 0.00 |
| 1654 | <i>Shinella</i>                            | genus | 0.00  | 0.00 | 0.00 | 0.01 | 0.00 | 0.00 |
| 901  | <i>Paenibacillus</i>                       | genus | 0.00  | 0.00 | 0.00 | 0.01 | 0.00 | 0.00 |
| 1283 | <i>Johnsonella</i>                         | genus | 0.00  | 0.00 | 0.00 | 0.01 | 0.00 | 0.00 |
| 1408 | <i>Ethanoligenens</i>                      | genus | 0.00  | 0.00 | 0.00 | 0.01 | 0.00 | 0.00 |
| 2619 | <i>Parcubacteria_genera_incertae_sedis</i> | genus | 0.00  | 0.00 | 0.00 | 0.01 | 0.00 | 0.00 |
| 2059 | <i>Opitutus</i>                            | genus | 0.00  | 0.00 | 0.00 | 0.01 | 0.00 | 0.00 |
| 994  | <i>Haematobacter</i>                       | genus | 0.00  | 0.00 | 0.00 | 0.01 | 0.00 | 0.00 |
| 1646 | <i>Pantoea</i>                             | genus | 0.00  | 0.00 | 0.00 | 0.01 | 0.00 | 0.00 |
| 872  | <i>Aurantimonas</i>                        | genus | 0.00  | 0.00 | 0.05 | 0.00 | 0.00 | 0.00 |
| 269  | <i>Friedmanniella</i>                      | genus | 0.00  | 0.00 | 0.04 | 0.00 | 0.00 | 0.00 |
| 993  | <i>Gemmobacter</i>                         | genus | 0.00  | 0.00 | 0.02 | 0.00 | 0.00 | 0.00 |
| 887  | <i>Afipia</i>                              | genus | 0.00  | 0.00 | 0.02 | 0.00 | 0.00 | 0.00 |
| 92   | <i>Kineococcus</i>                         | genus | 0.00  | 0.00 | 0.00 | 0.00 | 0.00 | 0.00 |
| 397  | <i>Solirubrobacter</i>                     | genus | 0.00  | 0.00 | 0.00 | 0.00 | 0.00 | 0.00 |
| -    | <i>unclassified_Ruminococcaceae</i>        |       | 0.00  | 0.00 | 0.00 | 0.00 | 0.00 | 0.00 |
| 1618 |                                            |       |       |      |      |      |      |      |
| -1   | <i>unclassified_Lachnospiraceae</i>        |       | 0.00  | 0.00 | 0.00 | 0.00 | 0.00 | 0.00 |
| -2   | <i>unclassified_Clostridiales</i>          |       | 12.29 | 0.03 | 0.00 | 0.01 | 0.00 | 0.00 |

|           |                                         |  |       |      |       |       |      |      |
|-----------|-----------------------------------------|--|-------|------|-------|-------|------|------|
| -568      | <i>unclassified_Bacteria</i>            |  | 10.49 | 0.01 | 0.00  | 0.00  | 0.02 | 0.00 |
| -941      | <i>unclassified_Erysipelotrichaceae</i> |  | 4.81  | 0.01 | 0.00  | 0.02  | 0.04 | 0.02 |
| -871      | <i>unclassified_Coriobacteriaceae</i>   |  | 3.99  | 1.21 | 16.05 | 10.17 | 0.88 | 0.50 |
| -843      | <i>unclassified_Firmicutes</i>          |  | 3.73  | 0.00 | 0.00  | 0.00  | 0.00 | 0.00 |
| -<br>1502 | <i>unclassified_Enterobacteriaceae</i>  |  | 1.53  | 0.00 | 0.00  | 0.00  | 0.01 | 0.00 |

**Supplementary Table 3.** Shared phylotypes (shared OTUs at genus level-L6 otu.biom) between samples obtained by QIIME script (shared\_phylotypes.py) which computes from an OTU table a matrix with the number of shared phylotypes between all pairs of samples.

|          | Placenta | Infant | Meconium | Amniotic | Mother | Milk |
|----------|----------|--------|----------|----------|--------|------|
| Placenta | 82       | 24     | 62       | 63       | 46     | 60   |
| Infant   | 24       | 52     | 38       | 31       | 37     | 35   |
| Meconium | 62       | 38     | 119      | 80       | 64     | 74   |
| Amniotic | 63       | 31     | 80       | 129      | 65     | 77   |
| Mother   | 46       | 37     | 64       | 65       | 134    | 66   |
| Milk     | 60       | 35     | 74       | 77       | 66     | 117  |

**Supplementary Table 4.** The 5 most frequent shared phylotypes (shared OTUs at genus level-L6 otu.biom) between all groups (mother, amniotic fluid, placenta, meconium, colostrum and infant feces).

| Nº | Denovo OTU  | Taxonomical assignment RDP        | Group (% of presence) |                |          |           |          |        |
|----|-------------|-----------------------------------|-----------------------|----------------|----------|-----------|----------|--------|
|    |             |                                   | Mother                | Amniotic Fluid | Placenta | Colostrum | Meconium | Infant |
| 1  | denovo2044  | <i>Catenibacterium</i>            | 80.0                  | 100.0          | 93.3     | 100.0     | 33.3     | 73.3   |
| 2  | denovo8619  | <i>Bifidobacterium</i>            | 80.0                  | 100.0          | 80.0     | 93.3      | 86.7     | 13.3   |
| 3  | denovo3169  | <i>Nitrobacter</i>                | 46.7                  | 100.0          | 93.3     | 86.7      | 73.3     | 6.7    |
| 4  | denovo10230 | <i>Clostridium sensu stricto</i>  | 33.3                  | 60.0           | 20.0     | 93.3      | 86.7     | 100.0  |
| 5  | denovo10006 | <i>Veilonella</i>                 | 100.0                 | 33.3           | 6.7      | 86.7      | 53.3     | 93.3   |
| 6  | denovo8861  | <i>unclassified_Clostridiales</i> | 60.0                  | 53.3           | 26.7     | 93.3      | 53.3     | 73.3   |

# Core OTUs across 50 % of samples.

denovo2174

[u'k\_\_Bacteria', u'p\_\_Firmicutes', u'c\_\_Bacilli',  
u'o\_\_Lactobacillales', u'f\_\_Streptococcaceae',  
u'g\_\_Streptococcus', u's\_\_']

denovo3635

[u'k\_\_Bacteria', u'p\_\_Proteobacteria',  
u'c\_\_Gammaproteobacteria', u'o\_\_Enterobacteriales',  
u'f\_\_Enterobacteriaceae', u'g\_\_', u's\_\_']

denovo4536

[u'k\_\_Bacteria', u'p\_\_Actinobacteria', u'c\_\_Actinobacteria',  
u'o\_\_Actinomycetales', u'f\_\_Propionibacteriaceae',  
u'g\_\_Propionibacterium', u's\_\_acnes']

denovo6061

[u'k\_\_Bacteria', u'p\_\_Firmicutes', u'c\_\_Bacilli',  
u'o\_\_Bacillales']

denovo6608

[u'Unassigned']

denovo7145

u'k\_\_Bacteria', u'p\_\_Firmicutes', u'c\_\_Bacilli',  
u'o\_\_Lactobacillales', u'f\_\_Lactobacillaceae',  
u'g\_\_Lactobacillus', u's\_\_zeae']

denovo10787

[u'k\_\_Bacteria', u'p\_\_Proteobacteria',  
u'c\_\_Gammaproteobacteria', u'o\_\_Enterobacteriales',  
u'f\_\_Enterobacteriaceae', u'g\_\_', u's\_\_']

denovo11969

[u'k\_\_Bacteria', u'p\_\_Firmicutes', u'c\_\_Bacilli',  
u'o\_\_Lactobacillales', u'f\_\_Streptococcaceae',  
u'g\_\_Streptococcus', u's\_\_']

**Supplementary Table 5.** Sequencing details.

| <b>Raw data</b>   |                     |                        |
|-------------------|---------------------|------------------------|
| <b>Read Count</b> | <b>#Total bases</b> | <b>Avg.read length</b> |
| 411,660           | 137,441,821         | 333.9                  |

*Read count: The total number of sequence reads.*

*Total bases: The total number of bases in reads identified.*

*Average Read length: The Average length of reads.*

| <b>Sorted data</b> |               |                     |                        |
|--------------------|---------------|---------------------|------------------------|
| <b>Status</b>      | <b>#Reads</b> | <b>#Total bases</b> | <b>Avg.read length</b> |
| <i>Sorted</i>      | 329,261       | 110,209,331         | 334.717                |
| <i>NA</i>          | 82,398        | 17,354,190          | 210.614                |
| <i>LowQual</i>     | 1             | 0                   | 0.000                  |
|                    | 411,659       | 127,563,521         |                        |

NA: without barcode sequence

LowQual:length=0 (after trimming barcode sequence)

| <b>Assigned data</b>     |               |                     |                        |
|--------------------------|---------------|---------------------|------------------------|
| <b>Status</b>            | <b>#Reads</b> | <b>#Total bases</b> | <b>Avg.read length</b> |
| <i>Non-chimeric</i>      | 261,346       | 105,390,985.1       | 403.27                 |
| <i>Bacteria-assigned</i> | 242,552       |                     |                        |

**Supplementary Figure 1. Rarefaction curves using *Chao 1* richness estimator.** Rarefaction curves are shown grouped by maternal faeces (purple), placenta (yellow), amniotic fluid (red), colostrum (green), meconium (orange) and infant faeces (blue) samples (**A**) or individually for each sample (**B**).

**A**

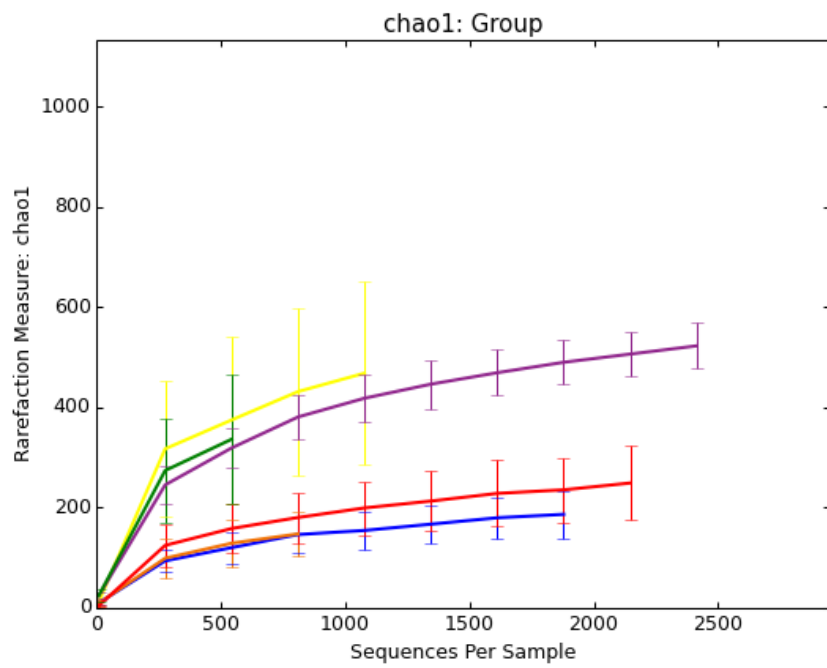

B

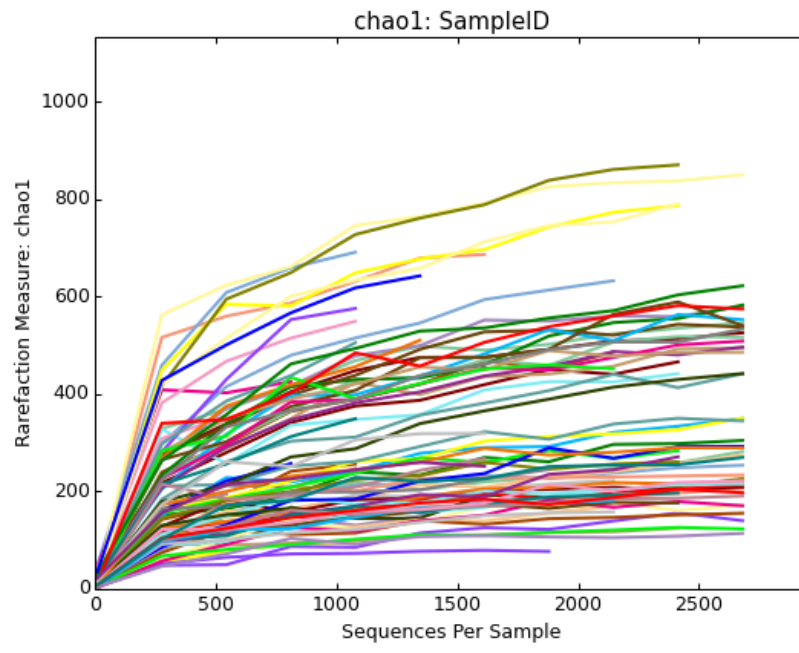

Supplement: srep23129-s1.pdf [file srep23129-s1.pdf]
